# Supplementary material for: Reporting of Observational Studies Explicitly Aiming to Emulate Randomized Trials: A Systematic Review
Source: PubMed Central journal article supplement (PMC10534275; doi:10.1001/jamanetworkopen.2023.36023), 2023-09-27
Supplement: jamanetwopen-e2336023-s001.pdf [file jamanetwopen-e2336023-s001.pdf]

1  
2  
3  
4  
5  
  
6  
7  
8  
9  
10  
11  
12  
13  
14  
15  
  
16  
  
17  
18  
19  
20  
21

## Supplemental Online Content

Hansford HJ, Cashin AG, Jones MD, et al. Reporting of observational studies explicitly emulating randomized trials: a systematic review. *JAMA Netw Open*. 2023;6(9):e2336023. doi:10.1001/jamanetworkopen.2023.36023

- Supplement 1. Appendix 1.** Methodological Differences to the Protocol
- Appendix 2.** Complete Search Strategies for All Databases
- Appendix 3.** List of Phrases Deemed to Indicate Explicit Emulation of a Target Trial
- Appendix 4.** Operational Definitions for Items of the Emulation of the Target Trial
- Appendix 5.** Items Extracted That Are Not Included in Commonly Used Reporting Guidelines (STROBE, RECORD, ISPOR)
- Appendix 6.** Reasons for Study Exclusion at Level of Full Text
- Appendix 7.** Subgroup Analysis of Reporting of Target Trial Protocol and How It Was Emulated, by Reporting Guideline Use

This supplemental material has been provided by the authors to give readers additional information about their work.

22 **Appendix 1. Methodological Differences to the Protocol**

23

24 We initially set out to identify ‘implicit’ emulations of a target trial as well as studies which  
25 explicitly state the study as an attempt to emulate a target trial. However, there are many ways  
26 by which a study could emulate a target trial without doing so explicitly. Therefore, to contain  
27 the scope of this study, we made a post-hoc decision to exclude studies from our analysis which  
28 we initially identified as implicitly emulating a target trial. The studies excluded at this stage  
29 are listed in Appendix 5.

30

31

32 **Appendix 2. Complete Search Strategies for All Databases**

33

34 Medline

35 1 (emulat\* adj5 trial?).mp. 177

36 2 (target adj (trial? or experiment?)).mp. 668

37 3. (observational adj (stud\* or research or data)).mp. 217117

38 4. ((real world or rwd) adj2 (stud\* or research or data)).mp. 11627

39 5. (routine\* adj2 data).mp. 8107

40 6. (comparative effectiveness adj2 (stud\* or research or data)).mp. 5817

41 7. (emulat\* or propensity score? or (causal adj2 (inference? or analys?s or effect\*))).mp.

42 51359

43 8. 3 or 4 or 5 or 6 or 7 284549

44 9. 2 and 8 89

45 10. (target adj (trial? or experiment?)).ti. 95

46 11. 1 or 9 or 10 254

47 Filtered for time (2012-2022) manually after search

48

49 Embase

50 1. (emulat\* adj5 trial?).mp.

51 2. (target adj (trial? or experiment?)).mp.

52 3. (observational adj (stud\* or research or data)).mp.

53 4. ((real world or rwd) adj2 (stud\* or research or data)).mp.

54 5. (routine\* adj2 data).mp.

55 6. (comparative effectiveness adj2 (stud\* or research or data)).mp.

56 7. (emulat\* or propensity score? or (causal adj2 (inference? or analys?s or effect\*))).mp.

57 8. 3 or 4 or 5 or 6 or 7

58 9. 2 and 8

59 10. (target adj (trial? or experiment?)).ti.

60 11. 1 or 9 or 10

61

62 psycINFO

63 noft(target trial emulat\*) OR ((noft(real world data) OR (noft(emulat\* trial)) OR

64 noft(observational) OR noft(routine\* data)) AND noft(comparative effective\*) AND

65 noft(causal infer\*))

66

67 Web of Science  
68 (TI=(emulat\* trial)) OR (TI=(real world data) OR TI=(routine\* data) OR  
69 TI=(comparative effectiveness study comparative effectiveness research or  
70 comparative effectiveness data) OR (TI=(emulat\* or propensity score?) AND  
71 TI=(causal inference or causal analysis or causal effect\*))) AND ALL=(target trial or  
72 emulat\* or target trial emulation)

73

74 note: '?' is used as a wildcard symbol to capture different spellings

75

76

77 **Appendix 3. List of Phrases Deemed to Indicate Explicit Emulation of a Target Trial**  
78 Target trial emulation, emulate\* *near* target trial, emulat\* trial, emulat\* *near* randomi?ed trial,  
79 trial emulation, randomi?ed trial emulation, hypothetical trial emulation, trial replication.  
80  
81 note: '?' is used as a wildcard symbol to capture different spellings  
82  
83

84 **Appendix 4. Operational Definitions for Items of the Emulation of the Target Trial**

85

| <b>Protocol element</b>        | <b>Requirements to be deemed reported</b>                                                                                                                                        |
|--------------------------------|----------------------------------------------------------------------------------------------------------------------------------------------------------------------------------|
| Eligibility criteria           | Stated all characteristics that define inclusion in the target trial                                                                                                             |
| Treatment strategies           | Stated the treatment strategies under comparison                                                                                                                                 |
| Treatment assignment           | Stated that randomization was assumed conditional on baseline covariates                                                                                                         |
| Outcome(s)                     | Stated the outcome(s) of interest                                                                                                                                                |
| Follow-up                      | Described the observation period of participants, including when follow up starts and ends                                                                                       |
| Causal contrast(s) of interest | Stated the estimand(s) of interest: e.g., intention-to-treat effect, per-protocol effect                                                                                         |
| Analysis plan                  | Described the statistical analyses, including methods by which covariates were adjusted to emulate randomization, e.g., matching, standardization, inverse-probability weighting |

86

87

88 **Appendix 5.:** Items Extracted That Are Not Included in Commonly Used Reporting  
89 Guidelines (STROBE, RECORD, ISPOR)

90

- 91 • Does it state whether the study was preregistered?
- 92 • Is a reason given that an RCT was not possible?
- 93 • Does the study describe itself as a target trial emulation?
- 94 • In regard to the definition of treatment strategy, which of the following do the study  
95 report: duration, type, frequency, dose, other, none)
- 96 • In what form does the study present the target trial / emulated protocol?
- 97 • **Assignment procedures:** Stated that treatment strategies were assigned based upon the  
98 assumption that randomization is being adequately emulated, or that baseline  
99 variables were adjusted for, given the baseline covariates are reported.
- 100 • **Time zero:** Does the study explicitly report how time zero was defined?
- 101 • **Causal contrast(s):** Does the study explicitly report the causal contrasts / estimands of  
102 interest?
- 103 • Does the study report if there are any potential unmeasured confounders?
- 104 • Does the study report how confounders were selected?
- 105 • Which casual assumptions are reported in the paper?
- 106 • Does the study describe similarities / differences between the ideal hypothetical  
107 randomized trial and emulation?
- 108 • Is a table comparing characteristics of participants between the two (or more)  
109 treatment groups presented?

110

111

112 **Appendix 6. Reasons for Study Exclusion at Level of Full Text**

113

114 **Not in English language (1)**

115

116 1. Pigeot I, Kollhorst B, Didelez V. [Secondary Data for Pharmacoepidemiological Research -  
117 Making the Best of It!]. *Gesundheitswesen*. Nov 2021;83(S 02):S69-s76. Nutzung von  
118 Sekundärdaten für die pharmakoepidemiologische Forschung – machen wir das Beste draus!  
119 doi:10.1055/a-1633-3827

120

121 **Not in humans (1)**

122

123 2. Van Cuong NK, B. T.: Phu, D. H.: Van, N. T. B.: Hien, V. B.: Thwaites, G.: Carrique-Mas, J.:  
124 Choisy, M. Effects of prophylactic and therapeutic antimicrobial uses in small-scale chicken  
125 flocks. *Zoonoses and Public Health*. August 2021;doi:<http://dx.doi.org/10.1111/zph.12839>

126

127 **Not in field of medicine (1)**

128

129 3. Vagni GB, Richard. Earnings and Income Penalties for Motherhood: Estimates for British  
130 Women Using the Individual Synthetic Control Method. *European Sociological Review*.  
131 2021;doi:10.1093/esr/jcab014

132

133 **Not an observational study (16)**

134

135 4. Atkinson AK, Michael G.: Clayton, Tim: Carpenter, James R. Reference-based sensitivity  
136 analysis for time-to-event data. *Pharmaceutical statistics*. 2019;doi:10.1002/pst.1954

137 5. Dehaene I, Roelens K, Smets K, Decruyenaere J. Relevance of the antenatal  
138 corticosteroids-to-delivery interval in the prevention of neonatal respiratory distress syndrome  
139 through the eyes of causal inference: a review and target trial. *Archives of Gynecology and*  
140 *Obstetrics*. April 2022;305(4):885-892. doi:<https://dx.doi.org/10.1007/s00404-021-06213-5>

141 6. Hsu GGM, Eric: Scheuer, Nicolas: Ramagopalan, Sreeram V. Keeping it real: implications  
142 of real-world treatment outcomes for first-line immunotherapy in metastatic non-small-cell  
143 lung cancer. *Journal*. 2021;doi:<http://dx.doi.org/10.2217/imt-2021-0237>

144 7. Jang H, Lee YB, Moon H, et al. Aspirin use and risk of hepatocellular carcinoma in  
145 patients with chronic hepatitis B with or without cirrhosis. *Hepatology (Baltimore, Md)*.  
146 2022;76(2):492-501. doi:10.1002/hep.32380

147 8. Mack CD, Pavesio A, Kelly K, et al. Breaking barriers: studying fracture healing in the  
148 BONES program. *Journal of Orthopaedic Trauma*. 2021;35:S22-S27.

149 9. Maguen S, Madden E, Holder N, et al. Effectiveness and comparative effectiveness of  
150 evidence-based psychotherapies for posttraumatic stress disorder in clinical practice. *Psychol*  
151 *Med*. May 18 2021:1-10. doi:10.1017/s0033291721001628

152 10. Persson E, Waernbaum I, Lind T. Estimating marginal causal effects in a secondary  
153 analysis of case-control data. *Statistics in Medicine*. 2017;36(15):2404-2419.

154 doi:<https://doi.org/10.1002/sim.7277>



- 155 11. Sachs MCS, A.: Gabriel, E. E. Aim for Clinical Utility, Not Just Predictive Accuracy.  
156 *Epidemiology*. 1-May 2020;doi:<http://dx.doi.org/10.1097/EDE.0000000000001173>
- 157 12. Simmonds KP, Burke J, Kozlowski AJ, Andary M, Luo Z, Reeves MJ. Rationale for a Clinical  
158 Trial That Compares Acute Stroke Rehabilitation at Inpatient Rehabilitation Facilities to Skilled  
159 Nursing Facilities: Challenges and Opportunities. *Archives of Physical Medicine and*  
160 *Rehabilitation*. 2021/09/01/ 2021;doi:<https://doi.org/10.1016/j.apmr.2021.08.004>
- 161 13. Smith MJ, Mansournia MA, Maringe C, et al. Introduction to computational causal  
162 inference using reproducible Stata, R, and Python code: A tutorial. *Statistics in Medicine*.  
163 2022;41(2):407-432. doi:<https://doi.org/10.1002/sim.9234>
- 164 14. Spera EG, Giovanni: Allegra, Dario: Stanco, Filippo: Maugeri, Andrea: Quattrocchi,  
165 Annalisa: Barchitta, Martina: Agodi, Antonella. CBMS - Randomized G-Computation Models in  
166 Healthcare Systems. *2018 IEEE 31st International Symposium on Computer-Based Medical*  
167 *Systems (CBMS)*. 2018;doi:10.1109/cbms.2018.00021
- 168 15. Stensrud MJ, Young JG, Didelez V, Robins JM, Hernán MA. Separable Effects for Causal  
169 Inference in the Presence of Competing Events. *Journal of the American Statistical Association*.  
170 2022/01/02 2020;117(537):175-183. doi:10.1080/01621459.2020.1765783
- 171 16. Stensrud MJS, Louisa H. Identification of vaccine effects when exposure status is  
172 unknown. *arXiv: Methodology*. 2021;doi:NA
- 173 17. Tobias DKL, M. What would the trial be? Emulating randomized dietary intervention  
174 trials to estimate causal effects with observational data. *American Journal of Clinical Nutrition*.  
175 1-Aug 2021;doi:<http://dx.doi.org/10.1093/ajcn/ngab169>
- 176 18. Usman MSP, B.: Butler, J. Target trial emulations: bridging the gap between clinical trial  
177 and real-world data. *European Journal of Heart Failure*. October  
178 2021;doi:<http://dx.doi.org/10.1002/ejhf.2331>
- 179 19. Yusuf E, Rosendaal FR. Valid Evidence for Diagnosis and Treatment of Infections in the  
180 Intensive Care Unit: Beyond Randomized Control Trial Study Design (Trial Emulation and  
181 Machine Learning). Editorial. *Journal of Clinical Medicine*. July-1 2022;11(13) (no  
182 pagination)3600. doi:<https://dx.doi.org/10.3390/jcm11133600>
- 183
- 184 **Not a target trial emulation (92)**
- 185
- 186 20. Bakker LJ, Goossens LM, O'Kane MJ, Uyl-de Groot CA, Redekop WK. Analysing electronic  
187 health records: The benefits of target trial emulation. *Health Policy and Technology*.  
188 2021;10(3):100545.
- 189 21. Bakker LJG, L. M. A.: O'Kane, M. J.: Uyl-de Groot, C. A.: Redekop, W. K. Analysing  
190 electronic health records: The benefits of target trial emulation. *Health Policy and Technology*.  
191 September 2021;doi:<http://dx.doi.org/10.1016/j.hlpt.2021.100545>
- 192 22. Beaudoin FLG, Roe: Merchant, Roland C.: Clark, Melissa A.: Swor, Robert A.: Jones,  
193 Jeffrey S.: Lee, David C.: Peak, David A.: Domeier, Robert M.: Rathlev, Niels K.: McLean, Samuel  
194 A. Persistent pain after motor vehicle collision: comparative effectiveness of opioids vs  
195 nonsteroidal antiinflammatory drugs prescribed from the emergency department-a propensity  
196 matched analysis. *Pain*. February 2017: 2022-01-27  
197 2017;doi:<http://dx.doi.org/10.1097/j.pain.0000000000000756>

198 23. Bijlsma MJW, Ben: Tarkiainen, Lasse: Myrskylä, Mikko: Martikainen, Pekka. The Impact  
199 of Unemployment on Antidepressant Purchasing: Adjusting for Unobserved Time-constant  
200 Confounding in the g-Formula. *Epidemiology (Cambridge, Mass)*.  
201 2019;doi:10.1097/ede.0000000000000985

202 24. Brennan BP, Schnabel J, Pope HG, Hudson JI. Antidepressant use and risk of intubation  
203 or death in hospitalized patients with COVID-19: A retrospective cohort study of clinical  
204 effectiveness. *Frontiers in Psychiatry*. 2022;13(NA):NA-NA. doi:10.3389/fpsy.2022.951065

205 25. Brenner SKOG, B. P.: Krajewski, M. L.: Charytan, D. M.: Chaudhry, S.: Mirza, S. H.: Peev,  
206 V.: Anderson, M.: Bansal, A.: Hayek, S. S.: Srivastava, A.: Mathews, K. S.: Johns, T. S.: Leonberg-  
207 Yoo, A.: Green, A.: Arunthamakun, J.: Wille, K. M.: Shaukat, T.: Singh, H.: Admon, A. J.: Semler,  
208 M. W.: Hernan, M. A.: Mueller, A. L.: Wang, W.: Leaf, D. E.: Walther, C. P.: Anumudu, S. J.:  
209 Kopecky, K. F.: Milligan, G. P.: McCullough, P. A.: Nguyen, T. D.: Shaefi, S.: Baskin, S. M.:  
210 Shankar, S.: Valencia, J. D.: Pannu, A.: Hayes, M. M.: Grandin, E. W.: Waikar, S. S.: Kibbelaar, Z.  
211 A.: Athavale, A. M.: Hart, P.: Upadhyay, S.: Vohra, I.: Oyintayo, A.: Rachoin, J. S.: Schorr, C. A.:  
212 Shea, L.: Edmonston, D. L.: Mosher, C. L.: Shehata, A. M.: Cohen, Z.: Allusson, V.: Bambrick-  
213 Santoyo, G.: Bhatti, N.: Mehta, B.: Williams, A.: Walters, P.: Go, R. C.: Rose, K. M.: Lisk, R.: Chan,  
214 L.: Coca, S. G.: Altman, D. R.: Saha, A.: Soh, H.: Wen, H. H.: Bose, S.: Leven, E. A.: Wang, J. G.:  
215 Mosoyan, G.: Nadkarni, G. N.: Pattharanitima, P.: Gallagher, E. J.: Friedman, A. N.: Guirguis, J.:  
216 Kapoor, R.: Meshberger, C.: Kelly, K. J.: Parikh, C. R.: Garibaldi, B. T.: Corona-Villalobos, C. P.:  
217 Wen, Y.: Menez, S.: Malik, R. F.: Cervantes, C. E.: Gautam, S. C.: Mallappallil, M. C.: Ouyang, J.:  
218 John, S.: Yap, E.: Melaku, Y.: Mohamed, I.: Bajracharya, S.: Puri, I.: Thaxton, M.: Bhattacharya, J.:  
219 Wagner, J.: Boudourakis, L.: Nguyen, H. B.: Ahoulim, A.: Thomas, L. F.: Sirganagari, D. R.: Guru,  
220 P. K.: Kashani, K.: Tehranian, S.: Zhou, Y.: Bergl, P. A.: Rodriguez, J.: Shah, J. A.: Gupta, M. S.:  
221 Kumar, P. N.: Lazarous, D. G.: Kassaye, S. G.: Melamed, M. L.: Mocerino, T. S. J. R.: Prudhvi, K.:  
222 Zhu, D.: Levy, R. V.: Azzi, Y.: Fisher, M.: Yunes, M.: Sedaliu, K.: Golestaneh, L.: Brogan, M.:  
223 Kumar, N.: Chang, M.: Thakkar, J.: Raichoudhury, R.: Athreya, A.: Farag, M.: Schenck, E. J.: Cho,  
224 S. J.: Plataki, M.: Alvarez-Mulett, S. L.: Gomez-Escobar, L. G.: Pan, D.: Lee, S.: Krishnan, J.:  
225 Whalen, W.: Charytan, D.: Macina, A.: Wu, B.: Modersitzki, F.: Leidner, A. S.: Martinez, C.:  
226 Kruser, J. M.: Wunderink, R. G.: Hodakowski, A. J.: Velez, J. C. Q.: Price-Haywood, E. G.: Matute-  
227 Trochez, L. A.: Hasty, A. E.: Mohamed, M. M. B.: Avasare, R. S.: Zonies, D.: Sise, M. E.: Newman,  
228 E. T.: Omar, S. A.: Pokharel, K. K.: Correa, S.: Kamal, O.: Yang, H.: Boateng, J. O.: Lee, M.:  
229 Strohbehn, I. A.: Li, J.: Redfern, R. E.: Cairl, N. S.: Naimy, G.: Abu-Saif, A.: Hall, D.: Bickley, L.:  
230 Rowan, C.: Madhani-Lovely, F.: Reiser, J.: Byun, J. J.: Vissing, A.: Kapania, E. M.: Post, Z.: Patel, N.  
231 P.: Hermes, J. M.: Sutherland, A. K.: Patrawalla, A.: Finkel, D. G.: Danek, B. A.: Arikapudi, S.:  
232 Paer, J. M.: Cangialosi, P.: Liotta, M.: Radbel, J.: Puri, S.: Sunderram, J.: Scharf, M. T.: Ahmed, A.:  
233 Berim, I.: Vatson, J. S.: Anand, S.: Levitt, J. E.: Garcia, P.: Boyle, S. M.: Song, R.: Arif, A.: Zhang, J.:  
234 Woo, S. H.: Deng, X.: Katz-Greenberg, G.: Senter, K.: Sharshir, M. A.: Rusnak, V. V.: Ali, M. I.:  
235 Peters, T.: Hughes, K.: Podoll, A. S.: Chonchol, M.: Sharma, S.: Burnham, E. L.: Rashidi, A.: Hejal,  
236 R.: Judd, E.: Latta, L.: Tolwani, A.: Albertson, T. E.: Adams, J. Y.: Chang, S. Y.: Beutler, R. M.:  
237 Schulze, C. E.: Macedo, E.: Rhee, H.: Liu, K. D.: Jotwani, V. K.: Koyner, J. L.: Kunczt, A.: Shah, C.  
238 V.: Jaikaransingh, V.: Toth-Manikowski, S. M.: Joo, M. J.: Lash, J. P.: Neyra, J. A.: Chaaban, N.:  
239 Elias, M.: Ahmad, Y.: Dy, R.: Iardino, A.: Au, E. H.: Sharma, J. H.: Sosa, M. A.: Taldone, S.:  
240 Contreras, G.: De La Zerda, D.: Fornoni, A.: Gershengorn, H. B.: Blakely, P.: Berlin, H.: Azam, T.  
241 U.: Shadid, H.: Pan, M.: Hayer, P. O.: Meloche, C.: Feroze, R.: Padalia, K. J.: Bitar, A.: Leya, J.:

242 Donnelly, J. P.: Flythe, J. E.: Tugman, M. J.: Chang, E. H.: Brown, B. R.: Leonberg-Yoo, A. K.:  
243 Spiardi, R. C.: Miano, T. A.: Roche, M. S.: Vasquez, C. R.: Bansal, A. D.: Ernecoff, N. C.: Kapoor, S.:  
244 Verma, S.: Chen, H.: Kovesdy, C. P.: Molnar, M. Z.: Azhar, A.: Hedayati, S. S.: Nadamuni, M. V.:  
245 Shastri, S.: Willett, D. L.: Short, S. A. P.: Renaghan, A. D.: Enfield, K. B.: Bhatraju, P. K.: Malik, A.  
246 B.: Vijayan, A.: Joy, C. M.: Li, T.: Goldberg, S.: Kao, P. F.: Goyal, N.: Faugno, A. J.: Schumaker, G.  
247 L.: Hsu, C. M.: Tariq, A.: Meyer, L.: Kshirsagar, R. K.: Jose, A.: Weiner, D. E.: Christov, M.:  
248 Griffiths, J.: Gupta, S.: Kapoor, A.: Chugh, S.: Wilson, P.: Arora, T.: Ugwuowo, U. Extracorporeal  
249 membrane oxygenation in patients with severe respiratory failure from COVID-19. *Intensive*  
250 *Care Medicine*. February 2021;doi:<https://dx.doi.org/10.1007/s00134-020-06331-9>  
251 26. Butler AMB, Alexander: Sahrman, John M.: Brookhart, M. Alan. Estimating the  
252 Effectiveness of Rotavirus Vaccine Schedules. *Epidemiology (Cambridge, Mass)*. 2021 Jul 01:  
253 2022-01-27 2021;doi:<http://dx.doi.org/10.1097/EDE.0000000000001363>  
254 27. Butler AML, J. B.: Reams, B. D.: Panozzo, C. A.: Brookhart, M. A. Study design and  
255 analytic approach for research on the effectiveness of childhood vaccine schedules.  
256 *Pharmacoepidemiology and Drug Safety*. August 2016;doi:<http://dx.doi.org/10.1002/pds.4070>  
257 28. C. D. Mitnick RAW, C. Lu, C. A. Rodriguez, J. Bayona, M. C. Becerra, et al. Multidrug-  
258 resistant tuberculosis treatment failure detection depends on monitoring interval and  
259 microbiological method. *European Respiratory Journal*. 2016;doi:10.1183/13993003.00462-  
260 2016  
261 29. Canfield S, Kemeter MJ, Febbo PG, Hornberger J. Balancing Confounding and  
262 Generalizability Using Observational, Real-world Data: 17-gene Genomic Prostate Score Assay  
263 Effect on Active Surveillance. *Rev Urol*. 2018;20(2):69-76. doi:10.3909/riu0799  
264 30. Caniglia ECM, Eleanor J.: Hernán, Miguel A.: Shahn, Zach. Estimating optimal dynamic  
265 treatment strategies under resource constraints using dynamic marginal structural models.  
266 *Statistics in medicine*. 2021;doi:10.1002/sim.9107  
267 31. Caporale JEP-R, A.: Beratarrechea, A. G.: Schulz-Hausmann, C. V.: Augustovski, F. A  
268 Comparison of 1-Year Treatment Costs in Patients with Type 2 Diabetes Following Initiation of  
269 Insulin Glargine or Insulin Detemir in Argentina. *Value Health Reg Issues*. Dec  
270 2014;doi:10.1016/j.vhri.2014.02.007  
271 32. Chaisson LHR, M.: Cantu, D.: Haller, B.: Millman, A. J.: Cattamanchi, A.: Davis, J. L. Impact  
272 of GeneXpert MTB/RIF assay on triage of respiratory isolation rooms for inpatients with  
273 presumed tuberculosis: a hypothetical trial. *Clin Infect Dis*. Nov-15 2014;doi:10.1093/cid/ciu620  
274 33. Chakravarti PW, A.: Krikov, S.: Shao, N.: van der Laan, M. PIN68 Estimating Effects in  
275 Observational Real-World Data, From Target Trials to Targeted Learning: Example of Treating  
276 COVID-Hospitalized Patients. *Value in Health*. June  
277 2021;doi:<http://dx.doi.org/10.1016/j.jval.2021.04.1256>  
278 34. Challa APN, X.: Garrison, E. A.: Van Driest, S. L.: Bastarache, L. M.: Lippmann, E. S.:  
279 Lavieri, R. R.: Goldstein, J. A.: Aronoff, D. M. Clinical trial emulation can identify new  
280 opportunities to enhance the regulation of drug safety in pregnancy. *medRxiv*.  
281 2021;doi:<https://dx.doi.org/10.1101/2021.11.12.21266269>  
282 35. Chang P-YW, Wei Ting: Wu, Wei-Lun: Chang, Hui-Chin: Chen, Chen Huan: Tsai, Yi Wen:  
283 Chiou, Shih-Hwa: Lip, Gregory Y. H.: Cheng, Hao Min: Chiang, Chern-En. Oral Anticoagulation  
284 Timing in Patients with Acute Ischaemic Stroke and Atrial Fibrillation. *Thrombosis and*  
285 *haemostasis*. 2021;doi:10.1055/a-1669-4987

- 286 36. Chen X. Causal Inference and Prediction on Observational Data with Survival Outcomes.  
287 NA. 2020;doi:NA
- 288 37. Chi-Shin WY, Albert C.: Chang, Shu-Sen: Chang, Chia-Ming: Liu, Yi-Hung: Liao, Shih-  
289 Cheng: Tsai, Hui-Ju. Validation of Machine Learning-Based Individualized Treatment for  
290 Depressive Disorder Using Target Trial Emulation. *Journal of personalized medicine*. 2021 Dec  
291 07: 2022-01-28 2021;doi:<http://dx.doi.org/10.3390/jpm11121316>
- 292 38. Conner SCL, Sara: Lunetta, Kathryn L.: Casas, Juan P.: Lubitz, Steven A.: Ellinor, Patrick T.:  
293 Anderson, Christopher D.: Huang, Qiuxi: Coleman, Justin: White, Wendy B.: Benjamin, Emelia J.:  
294 Trinquart, Ludovic. Refining the Association Between Body Mass Index and Atrial Fibrillation: G-  
295 Formula and Restricted Mean Survival Times. *Journal of the American Heart Association*.  
296 2019;doi:10.1161/jaha.119.013011
- 297 39. Cuzin LP, Pascal: Allavena, Clotilde: Katlama, Christine: Cotte, Laurent: Cheret, Antoine:  
298 Cabié, André: Rey, David: Chirouze, Catherine: Bani-Sadr, Firouze: Flandre, Philippe: Dat', Aids  
299 Study group. Comparative Effectiveness of First Antiretroviral Regimens in Clinical Practice  
300 Using a Causal Approach. *Medicine*. September 2015: 2022-01-27  
301 2015;doi:<http://dx.doi.org/10.1097/MD.0000000000001668>
- 302 40. D'Amico G, Abraldes JG, Rebora P, Valsecchi MG, Garcia-Tsao G. Ordinal Outcomes Are  
303 Superior to Binary Outcomes for Designing and Evaluating Clinical Trials in Compensated  
304 Cirrhosis. *Hepatology*. 2020;72(3):1029-1042. doi:<https://doi.org/10.1002/hep.31070>
- 305 41. D'Amico G, Abraldes JG, Rebora P, Valsecchi MG, Garcia-Tsao G. Ordinal outcomes are  
306 superior to binary outcomes for designing and evaluating clinical trials in compensated  
307 cirrhosis. *Hepatology*. 2020;72(3):1029-1042.
- 308 42. Danaei G, Pan, An, Hu, Frank B. and Hernán, Miguel A. Hypothetical Midlife  
309 Interventions in Women and Risk of Type 2 Diabetes. *Epidemiology*.  
310 2013;doi:10.1097/EDE.0b013e318276c98a
- 311 43. Ferguson ND, Scales DC, Pinto R, et al. Integrating mortality and morbidity outcomes:  
312 using quality-adjusted life years in critical care trials. *Am J Respir Crit Care Med*. Feb 1  
313 2013;187(3):256-61. doi:10.1164/rccm.201206-1057OC
- 314 44. Garcia-Aymerich J, Varraso R, Danaei G, Camargo CA, Jr., Hernán MA. Incidence of adult-  
315 onset asthma after hypothetical interventions on body mass index and physical activity: an  
316 application of the parametric g-formula. *Am J Epidemiol*. Jan 1 2014;179(1):20-6.  
317 doi:10.1093/aje/kwt229
- 318 45. Ghione P, Palomba ML, Patel AR, et al. Comparative effectiveness of ZUMA-5 (axi-cel) vs  
319 SCHOLAR-5 external control in relapsed/refractory follicular lymphoma. *Blood*.  
320 2022;140(8):851-860. doi:10.1182/blood.2021014375
- 321 46. Giannakeas V, Sopik V, Narod S. A Validation of Methods for the Evaluation of  
322 Observational Studies of Screening Mammography: An Exploratory Analysis Based on  
323 Simulating Screening Cohorts. *Clin Epidemiol*. 2020;12:1161-1169. doi:10.2147/clep.S267584
- 324 47. Gottenberg J-EM, Jacques: Perrodeau, Elodie: Bardin, Thomas: Combe, Bernard:  
325 Dougados, Maxime: Flipo, René-Marc: Saraux, Alain: Schaefferbeke, Thierry: Sibia, Jean:  
326 Soubrier, Martin: Vittecoq, Olivier: Baron, Gabriel: Constantin, Arnaud: Ravaud, Philippe:  
327 Mariette, Xavier. Comparative effectiveness of rituximab, abatacept, and tocilizumab in adults  
328 with rheumatoid arthritis and inadequate response to TNF inhibitors: prospective cohort study.  
329 *BMJ (Clinical research ed)*. 2019;doi:10.1136/bmj.l67

- 330 48. Hao YH, W. C.: Parzynski, C. S.: Lobetti Bodoni, C.: Hampson, L.: Masood, A.: Rhodes, W.:  
331 Wu, W. H. Utilization of External Control Arm to Contextualize Clinical Efficacy of  
332 Tisagenlecleucel Treated Among Patients with Relapsed/Refractory Follicular Lymphoma from  
333 the Single-Arm Elara Trial. *Blood*. 23-Nov 2021;doi:[https://dx.doi.org/10.1182/blood-2021-](https://dx.doi.org/10.1182/blood-2021-152685)  
334 [152685](https://dx.doi.org/10.1182/blood-2021-152685)
- 335 49. Harlow AF, Stokes AC, Brooks DR, et al. Prospective association between e-cigarette use  
336 frequency patterns and cigarette smoking abstinence among adult cigarette smokers in the  
337 United States. *Addiction (Abingdon, England)*. 2022;NA(NA):NA-NA. doi:10.1111/add.16009
- 338 50. Hazzouri AZAJ, Neal: Grasset, Leslie: Kaiser, Paulina: Kezios, Katrina L.: Calonico,  
339 Sebastian: Glymour, M. Maria: Hirsch, Calvin H.: Arnold, Alice M.: Varadhan, Ravi: Opoodden,  
340 Michelle C. Cannot retrieve FT - Statins and cognitive decline in the Cardiovascular Health  
341 Study: A comparison of different analytical approaches. *The journals of gerontology Series A,*  
342 *Biological sciences and medical sciences*. 2021;doi:10.1093/gerona/glab220
- 343 51. Henry DA, Jones MA, Stehlik P, Glasziou PP. Effectiveness of COVID-19 vaccines: findings  
344 from real world studies. *The Medical Journal of Australia*. 2021;215(4):149.
- 345 52. Hernán MA, Robins J. Observational Studies Analyzed Like Randomized Trials and Vice  
346 Versa.  
347 *Methods in Comparative Effectiveness Research*. 1st ed. Chapman and Hall/CRC; 2017:22.
- 348 53. Högnäs RSB, Maarten J.: Högnäs, Ulf: Blomqvist, Sandra: Westerlund, Hugo: Hanson,  
349 Linda Magnusson. It's giving me the blues: A fixed-effects and g-formula approach to  
350 understanding job insecurity, sleep disturbances, and major depression. *Social science &*  
351 *medicine (1982)*. 2022;doi:10.1016/j.socscimed.2022.114805
- 352 54. Hu A-MS, Zhi-Ming: Zhang, Zhong-Jun: Li, Hui-Ping. Comparative Efficacy of Fentanyl and  
353 Morphine in Patients with or At Risk for Acute Respiratory Distress Syndrome: A Propensity  
354 Score-Matched Cohort Study. *Drugs in R&D*. 2021;doi:[http://dx.doi.org/10.1007/s40268-021-](http://dx.doi.org/10.1007/s40268-021-00338-3)  
355 [00338-3](http://dx.doi.org/10.1007/s40268-021-00338-3)
- 356 55. Huang BM, E. M.: Chen, C.: Guo, J.: Lovell, D. J.: Brunner, H. I. THU0547 Real-world  
357 effectiveness of early aggressive treatment with biological disease-modifying antirheumatic  
358 drugs for the treatment of newly diagnosed polyarticular form of juvenile idiopathic arthritis.  
359 *Annals of the Rheumatic Diseases*. 2018;doi:[http://dx.doi.org/10.1136/annrheumdis-2018-](http://dx.doi.org/10.1136/annrheumdis-2018-eular.3705)  
360 [eular.3705](http://dx.doi.org/10.1136/annrheumdis-2018-eular.3705)
- 361 56. Jafarzadeh SRT, Benjamin S.: Marschall, Jonas: Fraser, Victoria J.: Gill, Jeff: Warren, David  
362 K. Quantifying the improvement in sepsis diagnosis, documentation, and coding: the marginal  
363 causal effect of year of hospitalization on sepsis diagnosis. *Annals of epidemiology*.  
364 2015;doi:10.1016/j.annepidem.2015.10.008
- 365 57. Jain PS, Claudia K.: Rexrode, Kathryn M.: Manson, JoAnn E.: Robins, James M.: Hernán,  
366 Miguel A.: Danaei, Goodarz. Hypothetical Lifestyle Strategies in Middle-Aged Women and the  
367 Long-Term Risk of Stroke. *Stroke*. 2020;doi:10.1161/strokeaha.119.026761
- 368 58. Jelinek TM, Vladimir: Pour, Lud\_k: Spicka, Ivan: Mina\_ík, Ji\_í: Gregora, Ev\_en: Kessler,  
369 Petr: S\_kora, Michal: Fra\_ková, Hana: Adamova, Dagmar: Wrobel, Marek: Mikula, Peter:  
370 Jarkovsk\_, Ji\_í: Diels, Joris: Gatopoulou, Xenia: Veselá, \_árka: Besson, Hervé: Bro\_ová, Lucie: Ito,  
371 Tetsuro: Hájek, Roman. Adjusted comparison of daratumumab monotherapy versus real-world  
372 historical control data from the Czech Republic in heavily pretreated and highly refractory

373 multiple myeloma patients. *Current medical research and opinion*.  
374 2018;doi:10.1080/03007995.2017.1410121

375 59. Jemielita TW, Linnea: Fox, Claire: Salomonsson, Stina: Liaw, Kai-Li: Pettersson, Andreas.  
376 Replication of Oncology Randomized Trial Results using Swedish Registry Real World-Data: A  
377 Feasibility Study. *Clinical pharmacology and therapeutics*.  
378 2021;doi:<http://dx.doi.org/10.1002/cpt.2424>

379 60. Karthikesalingam AW, Anders: Holt, Peter J. E.: Vidal-Diez, Alberto: Brownrigg, Jack:  
380 Shpitsner, Ilya: Björck, Martin: Thompson, Matt M.: Mani, Kevin. Comparison of long-term  
381 mortality after ruptured abdominal aortic aneurysm in England and Sweden. *The British journal*  
382 *of surgery*. 2015;doi:10.1002/bjs.10049

383 61. Kim YT, Yuxi: Yang, Jianxiao: Huser, Vojtech: Jin, Peng: Lambert, Christophe G.: Park,  
384 Hojun: You, Seng Chan: Park, Rae Woong: Rijnbeek, Peter R.: Van Zandt, Mui: Reich, Christian:  
385 Vashisht, Rohit: Wu, Yonghui: Duke, Jon: Hripcsak, George: Madigan, David: Shah, Nigam H.:  
386 Ryan, Patrick B.: Schuemie, Martijn J.: Suchard, Marc A. Comparative safety and effectiveness of  
387 alendronate versus raloxifene in women with osteoporosis. *Scientific reports*.  
388 2020;doi:<http://dx.doi.org/10.1038/s41598-020-68037-8>

389 62. Kishimoto T, Churiki M, Miyazato T, Yamashiro A, Nagasawa Y, Shokita H. Association  
390 between lifestyle and metabolic syndrome incidence of workers in northern Okinawa, Japan: A  
391 cohort study. *Preventive Medicine Reports*. December 2022;30 (no pagination)101995.  
392 doi:<https://dx.doi.org/10.1016/j.pmedr.2022.101995>

393 63. Kuehne FJ, B.: Conrads-Frank, A.: Bundo, M.: Arvandi, M.: Endel, F.: Popper, N.: Endel,  
394 G.: Urach, C.: Gyimesi, M.: Murray, E. J.: Danaei, G.: Gaziano, T. A.: Pandya, A.: Siebert, U.  
395 Guidance for a causal comparative effectiveness analysis emulating a target trial based on big  
396 real world evidence: When to start statin treatment. *Journal of Comparative Effectiveness*  
397 *Research*. 2019;doi:<http://dx.doi.org/10.2217/cer-2018-0103>

398 64. Li Y, Wang Q, Liang S, et al. Effect of Switching Antiretroviral Treatment Regimen in  
399 Patients With Drug-Resistant HIV-1 Infection: Retrospective Observational Cohort Study. *JMIR*  
400 *public health and surveillance*. 2022;8(6):e33429-e33429. doi:10.2196/33429

401 65. Lyu B, Hwang YJ, Selvin E, et al. Glucose-Lowering Agents and the Risk of Hypoglycemia:  
402 a Real-world Study. *Journal of general internal medicine*. 2022;NA(NA):NA-NA.  
403 doi:10.1007/s11606-022-07726-8

404 66. Mack CDP, Alessandra: Kelly, Kim: Irwin, Debra E.: Maislin, Greg: Jones, John: Wester,  
405 Tawana: Zura, Robert. Breaking Barriers: Studying Fracture Healing in the BONES Program.  
406 *Journal of orthopaedic trauma*. 2021 Mar 01: 2022-01-27  
407 2021;doi:10.1002/14651858.CD008579. AETNA. Bone Growth Stimulators. 2021.  
408 [[www.aetna.com](http://www.aetna.com)]. Available at: [http://www.aetna.com/cpb/medical/data/300\\_399/0343.html](http://www.aetna.com/cpb/medical/data/300_399/0343.html).  
409 Accessed January 6, 2021. BlueCross BlueShield BlueCare Network of Michigan. Bone Growth  
410 Stimulation: Ultrasound Accelerated Fracture Healing Device. 2020. [[www.bcbsm.com](http://www.bcbsm.com)].  
411 Available at:  
412 <https://www.bcbsm.com/amslibs/content/dam/public/mpr/mprsearch/pdf/2030582.pdf>.  
413 Accessed January 6, 2021. US Food and Drug Administration (FDA). Framework for the FDA's  
414 real world evidence program. 2018. [[www.fda.gov](http://www.fda.gov)]. Available at:  
415 <https://www.fda.gov/media/120060/download>. Accessed May 16, 2020. Boudreau DM, Yu O,  
416 Spangler L, et al. Accuracy of ICD-9 codes to identify nonunion and malunion and developing

417 algorithms to improve case-finding of nonunion and malunion. *Bone*. 2013;52:596–601.

418 Hernandez RK, Do TP, Critchlow CW, et al. Patient-related risk factors for fracture-healing  
419 complications in the United Kingdom general Practice research database. *Acta Orthop*.  
420 2012;83:653–660. Zura R, Xiong Z, Einhorn T, et al. Epidemiology of fracture in 18 human  
421 bones. *JAMA Surg*. 2016;151:e162775. Irwin DE, Kelly K, Winer I, et al. Methodologies for  
422 validation of diagnoses in real-world data: BONES—a case study. *J Ortho Trauma*. 2021;35 (suppl  
423 1): S28–S32. Chronic conditions data warehouse (CCDW). 2020. [[www.ccwdata.org](http://www.ccwdata.org)]. Available  
424 at: <https://www2.ccwdata.org/web/guest/home/>. Accessed October 16, 2020. Rubin D. For  
425 objective causal inference, design trumps analysis. *Ann Appl Stat*. 2008;2:808–840. Campbell G,  
426 Yue LQ. Statistical innovations in the medical device world sparked by the FDA. *J Biopharm Stat*.  
427 2016;26:3–16. Yue LQ. Regulatory considerations in the design of comparative observational  
428 studies using propensity scores. *J Biopharm Stat*. 2012;22:1272–1279. Mahendraratnam N,  
429 Mercon K, Eckert J, et al. Adding real-world evidence to a totality of evidence approach for  
430 evaluating marketed product effectiveness. 2019. [[www.healthpolicy.duke.edu](http://www.healthpolicy.duke.edu)]. Available at:  
431 [https://healthpolicy.duke.edu/publications/adding-real-world-evidence-totality-evidence-  
432 approach-evaluating-marketed-product](https://healthpolicy.duke.edu/publications/adding-real-world-evidence-totality-evidence-approach-evaluating-marketed-product). Accessed October 19, 2020. Mahendraratnam N,  
433 Eckert J, Mercon K, et al. Understanding the need for non-interventional studies using  
434 secondary data to generate real-world evidence for regulatory decision making and  
435 demonstrating their credibility. 2019. [<https://healthpolicy.duke.edu>]. Available at:  
436 [https://healthpolicy.duke.edu/publications/understanding-need-non-interventional-studies-  
437 using-secondary-data-generate-real-world](https://healthpolicy.duke.edu/publications/understanding-need-non-interventional-studies-using-secondary-data-generate-real-world). Accessed October 19, 2020. Krumholz H. Opinion:  
438 it's your right to see your medical records. It shouldn't be this hard to do. 2020. [[www.npr.org](http://www.npr.org)].  
439 Available at: [https://www.npr.org/sections/health-shots/2019/08/28/754725843/opinion-its-  
440 your-right-to-see-your-medical-records-it-shouldn-t-be-this-hard-to-](https://www.npr.org/sections/health-shots/2019/08/28/754725843/opinion-its-your-right-to-see-your-medical-records-it-shouldn-t-be-this-hard-to-). Accessed October 19,  
441 2020. Zura R, Irwin DE, Mack CD. Real-world evidence: a primer. *J Ortho Trauma*. 2021; 35  
442 (suppl 1): S1–S5.: <http://dx.doi.org/10.1097/BOT.0000000000002035>

443 67. Massaad EA. Validation of Clinical Prediction Models and Study of the Role of Modern  
444 Therapies Using Real-World Data in Spine Oncology. *Journal*. 2021;

445 68. McGinty EET, K. N.: Barry, C. L.: Bicket, M. C.: Rutkow, L.: Stuart, E. A. Protocol: mixed-  
446 methods study of how implementation of US state medical cannabis laws affects treatment of  
447 chronic non-cancer pain and adverse opioid outcomes. *Implementation science : IS*. 7-Jan  
448 2021;doi:<https://dx.doi.org/10.1186/s13012-020-01071-2>

449 69. Medenwald D, Vordermark D, Dietzel CT. Early Mortality of Prostatectomy vs.  
450 Radiotherapy as a Primary Treatment for Prostate Cancer: A Population-Based Study From the  
451 United States and East Germany. Original Research. *Frontiers in Oncology*. 2020-January-17  
452 2020;9doi:10.3389/fonc.2019.01451

453 70. Mokhayeri Y, Nazemipour M, Mansournia MA, Naimi AI, Kaufman JS. Does weight  
454 mediate the effect of smoking on coronary heart disease? Parametric mediational g-formula  
455 analysis. *PloS one*. 2022;17(1):e0262403–e0262403. doi:10.1371/journal.pone.0262403

456 71. Moon SL, Hae Young: Jang, Jieun: Park, Sue K. Association Between Angiotensin II  
457 Receptor Blockers and the Risk of Lung Cancer Among Patients With Hypertension From the  
458 Korean National Health Insurance Service-National Health Screening Cohort. *Journal of  
459 preventive medicine and public health = Yebang Uihakhoe chi*. 2020;doi:10.3961/jpmph.20.405

- 460 72. Moreno-Betancur MM, P.: Becker, D.: Patton, G. C.: Carlin, J. B. Mediation effects that  
461 emulate a target randomised trial: Simulation-based evaluation of ill-defined interventions on  
462 multiple mediators. *Statistical Methods in Medical Research*. June  
463 2021;doi:<http://dx.doi.org/10.1177/0962280221998409>  
464 73. Moriarty F, Thompson W, Boland F. Methods for evaluating the benefit and harms of  
465 deprescribing in observational research using routinely collected data. *Res Social Adm Pharm*.  
466 Feb 2022;18(2):2269-2275. doi:10.1016/j.sapharm.2021.05.007  
467 74. Moriarty FT, W.: Boland, F. Methods for evaluating the benefit and harms of  
468 deprescribing in observational research using routinely collected data. *Research in social &*  
469 *administrative pharmacy : RSAP*. 1-Feb  
470 2022;doi:<https://dx.doi.org/10.1016/j.sapharm.2021.05.007>  
471 75. Moura LM, Westover MB, Kwasnik D, Cole AJ, Hsu J. Causal inference as an emerging  
472 statistical approach in neurology: an example for epilepsy in the elderly. *Clinical epidemiology*.  
473 2016;9:9-18. doi:10.2147/CLEP.S121023  
474 76. Murray EJ, Marshall BDL, Buchanan AL. Emulating Target Trials to Improve Causal  
475 Inference From Agent-Based Models. *American Journal of Epidemiology*. 2021;190(8):1652-  
476 1658. doi:10.1093/aje/kwab040  
477 77. Neugebauer R, Fireman B, Roy JA, Raebel MA, Nichols GA, O'Connor PJ. Super learning  
478 to hedge against incorrect inference from arbitrary parametric assumptions in marginal  
479 structural modeling. *J Clin Epidemiol*. Aug 2013;66(8 Suppl):S99-109.  
480 doi:10.1016/j.jclinepi.2013.01.016  
481 78. O'Sullivan DE, Cheung WY, Boyne DJ, et al. Treatment patterns and survival outcomes of  
482 early-onset colorectal cancer patients in Alberta, Canada: a population-based study. *Cancer*  
483 *treatment and research communications*. 2022;32(NA):100585-100585.  
484 doi:10.1016/j.ctarc.2022.100585  
485 79. Ön BIV, Xavier: Berger, Ursula: Sabaté, Mònica: Ballarín, Elena: Maisterra, Olga: San-  
486 Jose, Antonio: Ibáñez, Luisa. Antidepressant use and stroke or mortality risk in the elderly.  
487 *European journal of neurology*. 2021;doi:10.1111/ene.15137  
488 80. Piccini JP. The importance of the design of observational studies in comparative  
489 effectiveness research: Lessons from the GARFIELD-AF and ORBIT-AF registries. *The American*  
490 *Heart Journal*. 2022;doi:<http://dx.doi.org/10.1016/j.ahj.2021.09.003>  
491 81. Prats-Urbe AT, M.: Villacampa, J. M.: Aguero, A.: Garcia-Bastida, C.: Tato, J. I.:  
492 Rodriganez, L.: Holguera, V. D.: Hernandez-Garcia, E.: Poletti, D.: Simonetti, G.: Villarraga, V.:  
493 Meler-Claramonte, C.: Sanchez Barrueco, A.: Chiesa-Estomba, C.: Casasayas, M.: Parente-Arias,  
494 P.: Mata-Castro, N.: Rello, J.: Castro, P.: Prieto-Alhambra, D.: Vilaseca, I.: Aviles-Jurado, F. X.  
495 Timing of elective tracheotomy and duration of mechanical ventilation among patients  
496 admitted to intensive care with severe COVID-19: A multicenter prospective cohort study. *Head*  
497 *& neck*. 1-Dec 2021;doi:<https://dx.doi.org/10.1002/hed.26863>  
498 82. Prospero M, Ghosh S, Chen Z, et al. Causal AI with Real World Data: Do Statins Protect  
499 from Alzheimer's Disease Onset? presented at: 2021 5th International Conference on Medical  
500 and Health Informatics; 2021; Kyoto, Japan. <https://doi.org/10.1145/3472813.3473206>  
501 83. Rassen JA, Murk W, Schneeweiss S. Real-world evidence of bariatric surgery and  
502 cardiovascular benefits using electronic health records data: A lesson in bias. *Diabetes, Obesity*  
503 *and Metabolism*. 2021;23(7):1453-1462. doi:<https://doi.org/10.1111/dom.14338>



- 504 84. Reeves BC, Scott LJ, Taylor J, et al. Effectiveness of Community versus Hospital Eye  
505 Service follow-up for patients with neovascular age-related macular degeneration with  
506 quiescent disease (ECHOES): a virtual non-inferiority trial. *BMJ Open*. 2016;6(7):e010685-  
507 e010685. doi:10.1136/bmjopen-2015-010685
- 508 85. Ren JL, Guangyou: Zhang, Liju: Zhang, Na: Ren, Juan. Hypothetical Interventions for Falls  
509 Among Older Adults: An Application of the Parametric G-Formula. *Frontiers in medicine*.  
510 2021;doi:10.3389/fmed.2021.732136
- 511 86. Requena GW, A.: Williams, R.: Dedman, D.: Quint, J. K.: Murray-Thomas, T.: Pimenta, J.  
512 M. Feasibility of using Clinical Practice Research Datalink data to identify patients with chronic  
513 obstructive pulmonary disease to enrol into real-world trials. *Pharmacoepidemiol Drug Saf*. Apr  
514 2021;doi:10.1002/pds.5188
- 515 87. Richardson KM, Katharina: Loke, Yoon K.: Steel, Nicholas: Fox, Chris: Grossi, Carlota M.:  
516 Bennett, Kathleen: Maidment, Ian: Boustani, Malaz: Matthews, Fiona E.: Myint, Phyto K.:  
517 Campbell, Noll L.: Brayne, Carol: Robinson, Louise: Savva, George M. History of Benzodiazepine  
518 Prescriptions and Risk of Dementia: Possible Bias Due to Prevalent Users and Covariate  
519 Measurement Timing in a Nested Case-Control Study. *American journal of epidemiology*.  
520 2019;doi:10.1093/aje/kwz073
- 521 88. Roberts MHM, Douglas W.: Petersen, Hans. Comparative Causal Analysis of the Effects  
522 of Long-Acting Muscarinic Antagonist Versus No Long-Acting Bronchodilator Use on  
523 Readmission or Mortality After Hospitalization for Chronic Obstructive Pulmonary Disease.  
524 *Drugs - real world outcomes*. March 2020: 2022-01-27  
525 2020;doi:<http://dx.doi.org/10.1007/s40801-019-00171-w>
- 526 89. Rostanski SKS, Zachary: Elkind, Mitchell S. V.: Liberman, Ava L.: Marshall, Randolph S.:  
527 Stillman, Joshua I.: Williams, Olajide: Willey, Joshua Z. Door-to-Needle Delays in Minor Stroke: A  
528 Causal Inference Approach. *Stroke*. 2017;doi:10.1161/strokeaha.117.017386
- 529 90. Sarayani A, Brown JD, Goodin AJ, et al. A Pharmacoepidemiologic Approach to Evaluate  
530 Real-world Effectiveness of Hormonal Contraceptives in the Presence of Drug-drug Interactions.  
531 *Epidemiology (Cambridge, Mass)*. 2021;32(2):268-276. doi:10.1097/EDE.0000000000001302
- 532 91. Schnitzer ME, Guerra SF, Longo C, Blais L, Platt RW. A potential outcomes approach to  
533 defining and estimating gestational age-specific exposure effects during pregnancy. *Stat*  
534 *Methods Med Res*. Feb 2022;31(2):300-314. doi:10.1177/09622802211065158
- 535 92. Shin H, Schneeweiss S, Glynn RJ, Patorno E. Evolving channeling in prescribing SGLT-2  
536 inhibitors as first-line treatment for type 2 diabetes. *Pharmacoepidemiology and drug safety*.  
537 2022;31(5):566-576. doi:10.1002/pds.5406
- 538 93. Suchard MAS, Martijn J.: Krumholz, Harlan M.: You, Seng Chan: Chen, Ruijun: Pratt,  
539 Nicole L.: Reich, Christian G.: Duke, Jon: Madigan, David: Hripcsak, George: Ryan, Patrick B.  
540 Comprehensive comparative effectiveness and safety of first-line antihypertensive drug classes:  
541 a systematic, multinational, large-scale analysis. *Lancet (London, England)*.  
542 2019;doi:10.1016/s0140-6736(19)32317-7
- 543 94. Suissa S. Single-arm Trials with Historical Controls: Study Designs to Avoid Time-related  
544 Biases. *Epidemiology (Cambridge, Mass)*. January 2021: 2022-01-27  
545 2021;doi:<http://dx.doi.org/10.1097/EDE.0000000000001267>

- 546 95. Szmulewicz AGB, Brian T.: Levin, Raisa: Huybrechts, Krista F. Risk of Overdose Associated  
547 With Co-prescription of Antipsychotics and Opioids: A Population-Based Cohort Study.  
548 *Schizophrenia bulletin*. 2021;doi:10.1093/schbul/sbab116
- 549 96. Tan KB, Jonathan: Segal, Brian D.: Bellomo, Lawrence: Nussbaum, Nate: Tucker, Melisa:  
550 Torres, Aracelis Z.: Bennette, Carrie: Capra, William B.: Curtis, Melissa D.: Miksad, Rebecca A.  
551 Emulating Control Arms for Cancer Clinical Trials Using External Cohorts Created From  
552 Electronic Health Record-Derived Real-World Data. *Clinical pharmacology and therapeutics*.  
553 2021;doi:10.1002/cpt.2351
- 554 97. Tardif I, Guénette L, Zongo A, Demers É, Lunghi C. Depression and the risk of  
555 hospitalization in type 2 diabetes patients: A nested case-control study accounting for non-  
556 persistence to antidiabetic treatment. *Diabetes & metabolism*. 2022;48(4):101334-101334.  
557 doi:10.1016/j.diabet.2022.101334
- 558 98. Taylor PT, D.: Lee, A. Y.: Mueller, P. L.: Schwartz, R.: Olvera-Barrios, A.: Warwick, A.:  
559 Patel, P. J.: Herren, T.: Egan, C.: Tufail, A. Emulated trial comparing the effectiveness of  
560 Bevacuzimab vs Afibercept using an external control arm. *Investigative Ophthalmology and*  
561 *Visual Science Conference: Annual Meeting Association for Research in Vision and*  
562 *Ophthalmology, ARVO*. 2021;
- 563 99. Toh SM, JoAnn E. An Analytic Framework for Aligning Observational and Randomized  
564 Trial Data: Application to Postmenopausal Hormone Therapy and Coronary Heart Disease.  
565 *Statistics in biosciences*. 2012;doi:10.1007/s12561-012-9073-6
- 566 100. Trujillo-Santos J, Farge-Bancel D, Pedrajas JM, et al. Enoxaparin versus dalteparin or  
567 tinzaparin in patients with cancer and venous thromboembolism: The RIETECAT study. *Research*  
568 *and practice in thrombosis and haemostasis*. 2022;6(4):e12736-NA. doi:10.1002/rth2.12736
- 569 101. Tsuzuki SH, Kayoko: N, Matsunaga: Terada, Mari: Suzuki, Satoshi: Ohtsu, Hiroshi: Asai,  
570 Yusuke: K, Kitajima: Saito, Sho: Uemura, Yukari: T, Shibata: Kondo, Masashi: K, Izumi: Hojo,  
571 Masayuki: Mizoue, Tetsuya: K, Yokota: F, Nakamura-Uchiyama: F, Saito: Sugiura, Wataru:  
572 Ohmagari, Norio. Efficacy of remdesivir in Japanese patients hospitalised with COVID-19: A  
573 large observational study using the COVID-19 Registry Japan. *NA*.  
574 2021;doi:10.1101/2021.03.09.21253183
- 575 102. Weberpals JB, T.: Davies, J.: Schmich, F.: Ruttinger, D.: Theis, F. J.: Bauer-Mehren, A.  
576 Deep learning-based propensity scores for confounding control in comparative effectiveness  
577 research: A large-scale, real-world data study. *Epidemiology*.  
578 2021;doi:<http://dx.doi.org/10.1097/EDE.0000000000001338>
- 579 103. Wharton JM, Piccini JP, Koren A, Huse S, Ronk CJ. Comparative Safety and Effectiveness  
580 of Sotalol Versus Dronedaron After Catheter Ablation for Atrial Fibrillation. *Journal of the*  
581 *American Heart Association*. 2022;11(3):e020506-NA. doi:10.1161/jaha.120.020506
- 582 104. Wu C-S, Yang AC, Chang S-S, et al. Validation of machine learning-based individualized  
583 treatment for depressive disorder using target trial emulation. *Journal of personalized medicine*.  
584 2021;11(12):1316.
- 585 105. Zash RC, E.: Mayondi, G.: Diseko, M.: Mabuta, J.: Jacobson, D.: Johnson, K.: Mmalane,  
586 M.: Makhema, J.: Lockman, S.: Shapiro, R. The risk of gestational hypertension with use of  
587 dolutegravir at conception. *Topics in Antiviral Medicine*. March 2021;

- 588 106. Zhang YL, Li-An: Starkopf, Liis: Chen, Jie: Wang, William. Estimation of causal effect in  
589 integrating randomized clinical trial and observational data - An example application to  
590 cardiovascular outcome trial. *Contemporary clinical trials*. 2021;doi:10.1016/j.cct.2021.106492  
591 **Post-hoc exclusions - 'Implicit' target trial emulation**
- 592 107. Hripcsak G, Suchard MA, Shea S, et al. Comparison of Cardiovascular and Safety  
593 Outcomes of Chlorthalidone vs Hydrochlorothiazide to Treat Hypertension. *JAMA Internal*  
594 *Medicine*. 2020;180(4):542-551. doi:10.1001/jamainternmed.2019.7454
- 595 108. Na EDC, Sung Woon: Ahn, Eun Hee: Jung, Sang Hee: Kim, Young Ran: Jung, Inkyung: Cho,  
596 Hee Young. Pregnancy outcomes of elective induction in low-risk term pregnancies: A  
597 propensity-score analysis. *Medicine*. 2019;doi:10.1097/md.00000000000014284
- 598 109. Naglich AC, Bozeman S, Brown ES, Adinoff B. Effect of Selective Serotonin Reuptake  
599 Inhibitors on Healthcare Utilization in Patients with Post-Traumatic Stress Disorder and Alcohol  
600 Use Disorder. *Alcohol Alcohol*. Jul 1 2019;54(4):428-434. doi:10.1093/alcalc/agg045
- 601 110. Patorno E, Schneeweiss S, Gopalakrishnan C, Martin D, Franklin JM. Using Real-World  
602 Data to Predict Findings of an Ongoing Phase IV Cardiovascular Outcome Trial: Cardiovascular  
603 Safety of Linagliptin Versus Glimepiride. *Diabetes Care*. Dec 2019;42(12):2204-2210.  
604 doi:10.2337/dc19-0069
- 605 111. You SC, Krumholz HM, Suchard MA, et al. Comprehensive Comparative Effectiveness  
606 and Safety of First-Line  $\beta$ -Blocker Monotherapy in Hypertensive Patients. *Hypertension*.  
607 2021;77(5):1528-1538. doi:doi:10.1161/HYPERTENSIONAHA.120.16402  
608
- 609 **Abstract / Protocol / Other secondary publication (92)**  
610
- 611 112. Abu-Raddad LJC, Hiam: Ayoub, Houssein H.: AlMukdad, Sawsan: Tang, Patrick: Hasan,  
612 Mohammad R.: Coyle, Peter: Yassine, Hadi M.: Al-Khatib, Hebah A.: Smatti, Maria K.: Al-  
613 Kanaani, Zaina: Al-Kuwari, Einas: Jeremijenko, Andrew: Kaleeckal, Anvar Hassan: Latif, Ali Nizar:  
614 Shaik, Riyazuddin Mohammad: Abdul-Rahim, Hanan F.: Nasrallah, Gheyath K.: Al-Kuwari,  
615 Mohamed Ghaith: Butt, Adeel A.: Al-Romaihi, Hamad Eid: Al-Thani, Mohamed H.: Al-Khal,  
616 Abdullatif: Bertollini, Roberto. Effectiveness of BNT162b2 and mRNA-1273 COVID-19 boosters  
617 against SARS-CoV-2 Omicron (B.1.1.529) infection in Qatar. *NA*.  
618 2022;doi:10.1101/2022.01.18.22269452
- 619 113. Amiri-Kordestani L, Gao X, Baxi S, et al. Generating real-world external comparators for  
620 randomized clinical trials (RCTs) in metastatic breast cancer (mBC) using electronic health  
621 records (EHRs). Conference Abstract. *Cancer Research Conference*. 2021;82(4  
622 SUPPL)doi:<https://dx.doi.org/10.1158/1538-7445.SABCS21-P2-11-05>
- 623 114. Andrew NC, L.: Kim, J.: Cadilhac, D.: Sundararajan, V.: Thrift, A.: Lannin, N.: Nelson, M.:  
624 Srikanth, V.: Kilkenny, M. Incentivising primary care practitioners to provide comprehensive  
625 chronic disease management improves survival following stroke: A target trial approach using  
626 linked registry data. *International Journal of Stroke*. October  
627 2021;doi:<http://dx.doi.org/10.1177/17474930211041949>
- 628 115. Birdthistle I. Must the evaluation of complex interventions be complex? learning from  
629 the impact evaluation of dreams. *Sexually Transmitted Infections*. July  
630 2019;doi:<http://dx.doi.org/10.1136/sextrans-2019-sti.17>

631 116. Boyne DJC, W. Y.: Hilsden, R. J.: Sajobi, T. T.: Batra, A.: Friedenreich, C. M.: Brenner, D. R.  
632 Association of a Shortened Duration of Adjuvant Chemotherapy with Overall Survival among  
633 Individuals with Stage III Colon Cancer. *JAMA Network Open*. 30-Mar  
634 2021;doi:<http://dx.doi.org/10.1001/jamanetworkopen.2021.3587>  
635 117. Cain LES, Michael S.: Petersen, Maya L.: May, Margaret T.: Ingle, Suzanne M.: Logan,  
636 Roger: Robins, James M.: Abgrall, Sophie: Shepherd, Bryan E.: Deeks, Steven G.: Gill, M. John:  
637 Touloumi, Giota: Vourli, Georgia: Dabis, François: Vandenhende, Marie-Anne: Reiss, Peter: van  
638 Sighem, Ard: Samji, Hasina: Hogg, Robert S.: Rybniker, Jan: Sabin, Caroline A.: Jose, Sophie: del  
639 Amo, Julia: Moreno, Santiago: Rodriguez, Benigno: Cozzi-Lepri, Alessandro: Boswell, Stephen L.:  
640 Stephan, Christoph: Pérez-Hoyos, Santiago: Jarrín, Inma: Guest, Jodie L.: Monforte, Antonella  
641 d'Arminio: Antinori, Andrea: Moore, Richard D.: Campbell, Colin N. J.: Casabona, Jordi: Meyer,  
642 Laurence: Seng, Rémonie: Phillips, Andrew N.: Bucher, Heiner C.: Egger, Matthias: Mugavero,  
643 Michael J.: Haubrich, Richard: Geng, Elvin: Olson, Ashley: Eron, Joseph J.: Napravnik, Sonia:  
644 Kitahata, Mari M.: Van Rompaey, Stephen E.: Teira, Ramón: Justice, Amy C.: Tate, Janet P.:  
645 Costagliola, Dominique: Sterne, Jonathan A. C.: Hernán, Miguel A. Using observational data to  
646 emulate a randomized trial of dynamic treatment-switching strategies: an application to  
647 antiretroviral therapy. *International journal of epidemiology*. 2015;doi:10.1093/ije/dyv295  
648 118. Charpignon M-LV-L, Bella: Zhang, B.: Magdomo, C.: Su, Bowen: Evans, Kyle: Rodriguez,  
649 Steven: Sololov, A.: Boswell, Sarah A.: Sheu, Yi-Han: Somai, M.: Middleton, Lefkos T.: Hyman, B.  
650 T.: Betensky, Rebecca A.: Finkelstein, S. N.: Welsch, R. E.: Tzoulaki, Ioanna: Blacker, Deborah:  
651 Das, Saumya: Albers, Mark W. Drug repurposing of metformin for Alzheimer's disease:  
652 Combining causal inference in medical records data and systems pharmacology for biomarker  
653 identification. *NA*. 2021;doi:10.1101/2021.08.10.21261747  
654 119. Chase DP, J. A.: Gupta, D.: Kalilani, L.: Woodward, T.: Gonzalez-Martin, A. Disease  
655 progression in patients with ovarian cancer who received first-line maintenance therapy or  
656 active surveillance, a us realworld analysis. *International Journal of Gynecological Cancer*.  
657 October 2021;doi:<https://dx.doi.org/10.1136/ijgc-2021-ESGO.455>  
658 120. Chen J, Diouf I, Taylor BV, Kalincik T, van der Mei I. Superior effects of natalizumab  
659 versus other DMTs on patient-reported outcomes in people with multiple sclerosis. *Journal of*  
660 *neurology, neurosurgery, and psychiatry*. 2022;93(10):1120-1127. doi:10.1136/jnnp-2022-  
661 329223  
662 121. Dahabreh IJN, J.: Zullo, A. R.: Crown, W. H.: Shah, N. D.: Inker, L. A. Emulating a multi-  
663 arm randomized controlled trial of antihypertensive treatments for chronic kidney disease using  
664 observational data: How do the results compare with network meta-analysis?  
665 *Pharmacoepidemiology and Drug Safety*. August 2017;doi:<http://dx.doi.org/10.1002/pds.4275>  
666 122. De Albeniz XGH, M.: Logan, R.: Price, M.: Hsu, J. Continuation of annual screening  
667 mammograms and breast-cancer mortality in women over 70. *Annals of Oncology*. October  
668 2019;doi:<http://dx.doi.org/10.1093/annonc/mdz263.016>  
669 123. De Albeniz XGH, J.: Hernan, M. A. Causal estimands in survival analysis with competing  
670 events: An application to breast cancer screening. *Pharmacoepidemiology and Drug Safety*.  
671 October 2020;doi:<https://dx.doi.org/10.1002/pds.5114>  
672 124. Deakin C, De Stavola B, Littlejohn G, et al. EMULATING A TARGET TRIAL of ADALIMUMAB  
673 VERSUS TOFACITINIB in PATIENTS with RHEUMATOID ARTHRITIS: A COMPARATIVE  
674 EFFECTIVENESS ANALYSIS USING the OPAL REAL-WORLD DATASET. Conference Abstract. *Annals*

675 of the *Rheumatic Diseases*. June 2022;81(Supplement 1):624-625.  
676 doi:<https://dx.doi.org/10.1136/annrheumdis-2022-eular.2515>  
677 125. Hernandez J, Kaul S, Fleishman A, et al. Adjuvant Chemotherapy Plus Radiotherapy Versus  
678 Chemotherapy Alone for Locally Advanced Bladder Cancer after Radical Cystectomy.  
679 Conference Abstract. *Journal of Urology*. May 2022;207(SUPPL 5):e489.  
680 doi:<https://dx.doi.org/10.1097/JU.0000000000002574.06>  
681 126. Fu EE, M.: Carrero, J. J.: Putter, H.: Clase, C. M.: Caskey, F.: Szymczak, M.: Torino, C.:  
682 Chesnaye, N.: Jager, K. J.: Wanner, C.: Dekker, F. W.: Van Diepen, M. When to initiate dialysis to  
683 reduce mortality and cardiovascular events in advanced CKD: A nationwide cohort study.  
684 *Nephrology Dialysis Transplantation*. May 2021;doi:<http://dx.doi.org/10.1093/ndt/gfab122.001>  
685 127. Gaber C, Shaheen NJ, Edwards JK, et al. Comparative effectiveness of trimodal therapy  
686 versus definitive chemoradiation in older adults with locally advanced esophageal cancer.  
687 Conference Abstract. *Journal of Clinical Oncology Conference: Annual Meeting of the American*  
688 *Society of Clinical Oncology, ASCO*. 2022;40(16 Supplement  
689 1)doi:[https://dx.doi.org/10.1200/JCO.2022.40.16\\_suppl.e16093](https://dx.doi.org/10.1200/JCO.2022.40.16_suppl.e16093)  
690 128. Galaznik AB, M.: Lempernesse, B.: Ransom, J.: Shilnikova, A. ABSTRACT ONLY Pmu8 a  
691 Systematic Approach for Synthetic Replication of Clinical Trial Cohorts Using Retrospective Real-  
692 World and Clinical Trial Data. *Value in Health*.  
693 2019;doi:<http://dx.doi.org/10.1016/j.jval.2019.04.1171>  
694 129. Garcia Rodriguez LAG, M. S.: Soriano, L. C. Low-dose acetylsalicylic acid and risk of  
695 colorectal cancer: Evidence from a primary care study in the UK. *Gastroenterology*. April 2015;  
696 130. Garcia-Albeniz XH, J.: Hernan, M. A. A word of caution: All-cause mortality and residual  
697 confounding in Medicare claims data. *Pharmacoepidemiology and Drug Safety*. August  
698 2018;doi:<http://dx.doi.org/10.1002/pds.4629>  
699 131. Gehr AL, Y.: Ghabach, B.: Narra, K.: Neerukonda, L. S.: Bullock, J.: Ojha, R. P. ABSTRACT  
700 ONLY Timing of adjuvant chemotherapy initiation and colon cancer survival. *Journal of Clinical*  
701 *Oncology Conference*. 2019;doi:<http://dx.doi.org/10.1200/JCO.2019.37.31-suppl.119>  
702 132. Granger E, Davies G, Keogh R. Investigating the effects of dornase alfa and hypertonic  
703 saline used in combination on lung function in people with cystic fibrosis. Conference Abstract.  
704 *Journal of Cystic Fibrosis*. June 2022;21(Supplement 1):S13.  
705 doi:<https://dx.doi.org/10.1016/S1569-1993%2822%2900189-8>  
706 133. Granger EF, F.: Keogh, R. Estimating the long-term effects of insulin on outcomes in  
707 cystic fibrosis-related diabetes: a target trial approach. *Journal of Cystic Fibrosis*. January  
708 2021;doi:<http://dx.doi.org/10.1016/S1569-1993%2821%2901095-X>  
709 134. Haller MCW, C.: Strohmaier, S.: Kammer, M.: Heinze, G.: Oberbauer, R. Cannot retrieve  
710 FT - Survival time gained by kidney transplantation compared to remaining waitlisted on  
711 dialysis: A national registry study using target trial emulation. *Journal of the American Society of*  
712 *Nephrology*. 2021;  
713 135. Harris JS, J. A. C.: Reeves, B. C.: Johnson, T. W.: Benedetto, U.: Lasserson, D.: Loke, Y.:  
714 Mumford, A.: Rogers, C. A.: Pufulete, M. ABSTRACT ONLY The ADAPTT Study: Using routinely-  
715 collected data to emulate a randomised trial. *Trials Conference: 5th International Clinical Trials*  
716 *Methodology Conference, ICTMC*. 2019;doi:<http://dx.doi.org/10.1186/s13063-019-3688-6>  
717 136. Himmelreich JCLV, S.: Camm, A. J.: Harskamp, R. E.: Pieper, K. S.: Fox, K. A. A.: Bassand, J.  
718 P.: Fitzmaurice, D. A.: Goldhaber, S. Z.: Goto, S.: Haas, S.: Misselwitz, F.: Turpie, A. G. G.:

719 Verheugt, F. W. A.: Kakkar, A. K. Comparing rivaroxaban and apixaban in GARFIELD-AF  
720 according to ROCKET AF and ARISTOTLE trial selection criteria. *European Heart Journal*.  
721 2021;doi:<http://dx.doi.org/10.1093/eurheartj/ehab724.0560>  
722 137. Huitfeldt A. Emulation of Target Trials to Study the Effectiveness and Safety of Medical  
723 Interventions. *Journal*. 2015;  
724 138. Iyer GSN. Safety and Effectiveness of Extended Treatment with Oral Anticoagulants  
725 among Patients with Unprovoked Venous Thromboembolism. *Journal*. 2021;  
726 139. Izdebski AT, Patrick: Lalisang, Robbert C. A.: McHugh, Dean M.: Entjes, Robert: van der  
727 Meer, Nardo J. M.: Dongelmans, Dave A.: Boelens, Age D.: Rigter, Sander: Hendriks, Stefaan H.  
728 A.: de Jong, Remko: Kamps, Marlijn J. A.: Peters, Marco: Karakus, Attila: Gommers, Diederik:  
729 Ramnarain, Dharmanand: Wils, Evert-Jan: Achterberg, Sefanja: Nowitzky, Ralph: van den  
730 Tempel, Walter: de Jager, Cornelis P. C.: Nooteboom, Fleur G. C. A.: Oostdijk, Evelien A. N.:  
731 Koetsier, Peter: Cornet, Alexander D.: Reidinga, Auke C.: de Ruijter, Wouter: Bosman, Rob J.:  
732 Frenzel, Tim: Urlings-Strop, Louise C.: de Jong, Paul: Smit, Ellen G. M.: Cremer, Olaf L.: van Osch,  
733 Frits H. M.: Faber, Harald J.: Lens, Judith: Brunnekreef, Gert B.: Festen-Spanjer, Barbara:  
734 Dormans, Tom: Simons, Bram: Rijkeboer, Annemieke: Dijkstra, Annemieke: Arbous, M. Sesmu:  
735 Aries, Marcel J. H.: Beukema, Menno: van Raalte, Rutger: van Tellingen, Martijn: van den Oever,  
736 Niels C. Gritters: Elbers, Paul W. G.: Cinà, Giovanni. A pragmatic approach to estimating average  
737 treatment effects from EHR data: the effect of prone positioning on mechanically ventilated  
738 COVID-19 patients. *arXiv: Learning*. 2021;doi:NA  
739 140. Jackson JW. A general framework for diagnosing confounding of time-varying and other  
740 joint exposures. *NA*. 2015;doi:NA  
741 141. Jackson JW. Diagnosing Covariate Balance Across Levels of Right-Censoring Before and  
742 After Application of Inverse-Probability-of-Censoring Weights. *American journal of*  
743 *epidemiology*. 2019;doi:10.1093/aje/kwz136  
744 142. Jackson JW, Garcia-Albeniz, XA. Studying the effects of nonindicated medications on  
745 cancer: Etiologic versus action-focused analysis of epidemiologic data. *Cancer epidemiology,*  
746 *biomarkers & prevention : a publication of the American Association for Cancer Research,*  
747 *cosponsored by the American Society of Preventive Oncology*. 2018;doi:10.1158/1055-9965.epi-  
748 17-0862  
749 143. Keogh RHG, Jon Michael: Seaman, Shaun R.: Davies, Gwyneth: Vansteelandt, Stijn.  
750 Causal inference in survival analysis using longitudinal observational data: Sequential trials and  
751 marginal structural models. *Journal*. 2021;  
752 144. Keogh RHS, S.: Gran, J.: Vansteelandt, S.: Bilton, D.: Carr, S. B. Emulating a target trial  
753 using the UK cystic fibrosis registry: The causal effect of DNASE on 5-year survival. *Pediatric*  
754 *Pulmonology*. 2019;doi:<http://dx.doi.org/10.1002/ppul.22495>  
755 145. Keshet AR, Hagai: Shilo, Smadar: Barbash-Hazan, Shiri: Amit, Guy: Bivas-Benita, Maytal:  
756 Yanover, Chen: Girshovitz, Irena: Akiva, Pinchas: Ben-Haroush, Avi: Hadar, Eran: Wiznitzer,  
757 Arnon: Segal, Eran. Estimating the effect of cesarean delivery on long term childhood health  
758 across two countries. *medRxiv*. 2020;doi:NA  
759 146. Kilkenny M. Target Trial Approach in Comparative Effectiveness Studies for Stroke.  
760 Conference Abstract. *Neuroepidemiology*. 2022;56(SUPPL 1):42.  
761 147. Kraglund F, Christensen DH, Jepsen P. Statins, but not aspirin, reduce the risk of  
762 hepatocellular carcinoma and mortality in Danish patients with cirrhosis due to alcohol-related

763 liver disease: a nationwide causal study. Conference Abstract. *Journal of Hepatology*. July  
764 2022;77(Supplement 1):S172-S173. doi:[https://dx.doi.org/10.1016/S0168-](https://dx.doi.org/10.1016/S0168-8278%2822%2900724-3)  
765 [8278%2822%2900724-3](https://dx.doi.org/10.1016/S0168-8278%2822%2900724-3)  
766 148. Kuehne FA, M.: Hess, L. M.: Faries, D. E.: Matteucci Gothe, R.: Gothe, H.: Beyrer, J.:  
767 Zeimet, A. G.: Stojkov, I.: Muhlberger, N.: Oberaigner, W.: Marth, C.: Siebert, U. ABSTRACT  
768 ONLY  
769 Assessing type and impact of biases potentially occurring when analyzing real world evidence:  
770 The case of second line treatment for ovarian cancer. *Value in Health*. 2018;  
771 149. Kuehne FR, U.: Paracha, N.: Yeh, J. M.: Sabate, E.: Siebert, U. Estimating Treatment-  
772 Switching Bias in a Randomized Clinical Trial of Ovarian Cancer Treatment: Combining Causal  
773 Inference with Decision-Analytic Modeling. *Medical decision making : an international journal*  
774 *of the Society for Medical Decision Making*.  
775 2022;doi:<https://dx.doi.org/10.1177/0272989X211026288>  
776 150. Larochelle MR, Lodi S, Yan S, Clothier BA, Goldsmith ES, Bohnert ASB. Comparative  
777 Effectiveness of Opioid Tapering or Abrupt Discontinuation vs No Dosage Change for Opioid  
778 Overdose or Suicide for Patients Receiving Stable Long-term Opioid Therapy. *JAMA Network*  
779 *Open*. 12 Aug 2022;5(8):E2226523.  
780 doi:<https://dx.doi.org/10.1001/jamanetworkopen.2022.26523>  
781 151. Lindbohm JVM, Nina: Sipilä, Pyry N.: Singh-Manoux, Archana: Runz, Heiko: Livingston,  
782 Gill: Seshadri, Sudha: Xavier, Ramnik: Hingorani, Aroon D.: Ripatti, Samuli: Kivimäki, Mika.  
783 Immune system and blood-brain barrier-wide biomarker analyses provide causal evidence for  
784 autoimmunity in dementia. *NA*. 2022;doi:10.1101/2022.02.17.22271136  
785 152. Lindquist A, Hastie R, Kennedy A, et al. Childhood developmental vulnerability following  
786 elective birth at 39 weeks'. Conference Abstract. *BJOG: An International Journal of Obstetrics*  
787 *and Gynaecology*. June 2022;129(Supplement 1):74. doi:[https://dx.doi.org/10.1111/1471-](https://dx.doi.org/10.1111/1471-0528.10_17178)  
788 [0528.10\\_17178](https://dx.doi.org/10.1111/1471-0528.10_17178)  
789 153. Madenci A. Causal Inference in Health Services Research. *Journal*. 2020 2020;  
790 154. Mahévas MT, Viet-Thi: Roumier, Mathilde: Chabrol, Amélie: Paule, Romain: Guillaud,  
791 Constance: Gallien, S.: Lepeule, Raphaël: Szwebel, Tali-Anne: Lescure, Xavier: Schlemmer,  
792 Frédéric: Matignon, Marie: Khellaf, Medhi: Crickx, Etienne: Terrier, Benjamin: Morbieu,  
793 Caroline: Legendre, Paul: Dang, Julien: Schoindre, Yoland: Pawlotski, Jean-Michel: Michel, Marc:  
794 Perrodeau, Elodie: Carlier, Nicolas: Roche, Nicolas: de Lastours, Victoire: Mouthon, Luc:  
795 Audureau, Etienne: Ravaud, Philippe: Godeau, Bertrand: Costedoat-Chalumeau, Nathalie. No  
796 evidence of clinical efficacy of hydroxychloroquine in patients hospitalized for COVID-19  
797 infection with oxygen requirement: results of a study using routinely collected data to emulate  
798 a target trial. *NA*. 2020;doi:10.1101/2020.04.10.20060699  
799 155. Maringe CBM, S.: Exarchakou, A.: Smith, M.: Ratchet, B.: Belot, A.: Leyrat, C. Reflection  
800 on modern methods: Trial emulation in the presence of immortal-time bias. Assessing the  
801 benefit of major surgery for elderly lung cancer patients using observational data. *International*  
802 *Journal of Epidemiology*. 1-Oct 2020;doi:<https://dx.doi.org/10.1093/ije/dyaa057>  
803 156. Martinez-Sanz J, Ron R, Moreno E, et al. 2DR VS 3DR INTEGRASE INHIBITOR-BASED  
804 REGIMENS INITIATION and CD4+/CD8+ RATIO RECOVERY. Conference Abstract. *Topics in*  
805 *Antiviral Medicine*. March 2022;30(1 SUPPL):184.

806 157. Matthews AD, Issa J.: Fröbert, Ole: Lindahl, Bertil: James, Stefan: Feychting, Maria:  
807 Jernberg, Tomas: Berglund, Anita: Hernán, Miguel A. Extending treatment effects from a  
808 randomized trial using observational data: an application to coronary thrombus aspiration. *NA*.  
809 2021;doi:10.1101/2021.09.06.21263156

810 158. Matulonis U, Mirza M, Malinowska I, Perhanidis J, Woodward T, Kalilani L. Real-world  
811 clinical outcomes with poly (adenosine diphosphate [ADP]-ribose) polymerase inhibitors as  
812 second-line maintenance therapy in patients with recurrent ovarian cancer in the United States  
813 (353). Conference Abstract. *Gynecologic Oncology*. August 2022;166(Supplement 1):S180-S181.  
814 doi:<https://dx.doi.org/10.1016/S0090-8258%2822%2901575-X>

815 159. McConeghy KWB, B.: Huang, A. W.: White, E. M.: Feifer, R. A.: Blackman, C.:  
816 Santostefano, C. M.: Lee, Y.: DeVone, F.: Halladay, C. W.: Rudolph, J. L.: Zullo, A. R.: Mor, V.:  
817 Gravenstein, S. Effectiveness of a SARS-CoV-2 mRNA vaccine booster dose for prevention of  
818 infection, hospitalization or death in two nation-wide nursing home systems. *medRxiv*.  
819 2022;doi:<https://dx.doi.org/10.1101/2022.01.25.22269843>

820 160. McDermott GF, X.: Cook, C.: Stone, J.: Zhang, Y.: Wallace, Z. Post-induction anca titer  
821 does not predict mortality or renal outcomes: A target trial emulation study. *Arthritis and*  
822 *Rheumatology*. September 2021;doi:<https://dx.doi.org/10.1002/art.41966>

823 161. McGinty EE, Tormohlen KN, Barry CL, Bicket MC, Rutkow L, Stuart EA. Protocol: mixed-  
824 methods study of how implementation of US state medical cannabis laws affects treatment of  
825 chronic non-cancer pain and adverse opioid outcomes. *Implementation Science*. 2021;16(1):1-  
826 13.

827 162. Mei H. Clinical Treatment Human Disease Networks and Comparative Effectiveness  
828 Research: Analyses of the Medicare Administrative Data. *Journal*. 2021 2021;

829 163. Miranda RS, Tinne: De Schreye, Robrecht: Faes, Kristof: Van Den Noortgate, Nele:  
830 Cohen, Joachim: Van den Block, Lieve. Improved quality of care and reduced healthcare costs at  
831 the end-of-life among older people with dementia who received palliative home care: A  
832 nationwide propensity score-matched decedent cohort study. *Palliative medicine*.  
833 2021;doi:10.1177/02692163211019321

834 164. Moreno-Betancur MM, Paul: Becker, Denise: Patton, George C.: Carlin, John B. Defining  
835 mediation effects for multiple mediators using the concept of the target randomized trial. *arXiv:*  
836 *Methodology*. 2019;doi:NA

837 165. Moura LM, Westover, M. Brandon, Kwasnik, David, Cole, Andrew J. and Hsu, John.  
838 Causal inference as an emerging statistical approach in neurology: an example for epilepsy in  
839 the elderly. *Clinical epidemiology*. 2016;doi:10.2147/CLEP.S121023

840 166. Narayan V. Comparing Cardiovascular Outcomes with Degarelix or Leuprolide as  
841 Prostate Cancer Therapy - Applying Real-world Data to Clinical Trial Emulation. *JAMA Network*  
842 *Open*. 22-Oct 2021;doi:<http://dx.doi.org/10.1001/jamanetworkopen.2021.31429>

843 167. Nguyen VG, Yavlinsky A, Beale S, et al. Comparative effectiveness of different primary  
844 vaccination courses on mRNA based booster vaccines against SARs-COV-2 infections: A time-  
845 varying cohort analysis using trial emulation in the Virus Watch community cohort. *medRxiv*.  
846 2022:2022.02.04.22270479. doi:10.1101/2022.02.04.22270479

847 168. Nguyen VGY, A.: Beale, S.: Hoskins, S.: Lamos, V.: Braithwaite, I.: Byrne, T. E.: Fong, W.  
848 L. E.: Fragaszy, E.: Geismar, C.: Kovar, J.: Navaratnam, A. M. D.: Patel, P.: Shrotri, M.: Weber, S.:  
849 Hayward, A. C.: Aldridge, R. W.: Michie, S.: Hardelid, P.: Wijlaars, L.: Nastouli, E.: Spyer, M.:



850 Killingley, B.: Cox, I.: McKendry, R. A.: Cheng, T.: Liu, Y.: Gibbs, J.: Gilson, R.: Lopez Bernal, J.:  
851 Johnson, A. M.: Rodger, A. Comparative effectiveness of ChAdOx1 versus BNT162b2 vaccines  
852 against SARS-CoV-2 infections in England and Wales: A cohort analysis using trial emulation in  
853 the Virus Watch community data. *medRxiv*.  
854 2021;doi:<https://dx.doi.org/10.1101/2021.12.21.21268214>  
855 169. Nielsen PB, Sjøgaard M, Skjøth F, Larsen TB, Lip GYH, Hernán M. IMPORTANCE OF THE  
856 ANALYTIC APPROACH WHEN COMPARING THE EFFECTIVENESS OF TREATMENTS: AN  
857 APPLICATION TO REDUCED DOSE NOACS FOR STROKE PREVENTION IN ATRIAL FIBRILLATION.  
858 *Journal of the American College of Cardiology*. 2020;75(11\_Supplement\_1):364-364.  
859 doi:doi:10.1016/S0735-1097(20)30991-8  
860 170. Parra CO, Waernbaum I, Schön S, Goetghebeur E. Trial emulation and survival analysis  
861 for disease incidence registers: a case study on the causal effect of pre-emptive kidney  
862 transplantation. *arXiv preprint arXiv:201111771*. 2020;  
863 171. Piske MT, T.: Krebs, E.: Hongdilokkul, N.: Bruneau, J.: Greenland, S.: Gustafson, P.: Karim,  
864 M. E.: McCandless, L. C.: MacLure, M.: Platt, R. W.: Siebert, U.: Eugenia Socias, M.: Tsui, J. I.:  
865 Wood, E.: Nosyk, B. Comparative effectiveness of buprenorphine-naloxone versus methadone  
866 for treatment of opioid use disorder: A population-based observational study protocol in British  
867 Columbia, Canada. *BMJ Open*. 9-Sep 2020;doi:[http://dx.doi.org/10.1136/bmjopen-2019-](http://dx.doi.org/10.1136/bmjopen-2019-036102)  
868 [036102](http://dx.doi.org/10.1136/bmjopen-2019-036102)  
869 172. Prats-Urbe A, Berencsi K, Carr A, et al. The performance of preference-based  
870 instrumental variables to emulate a randomized clinical trial of comparative medical device  
871 effectiveness. Wiley; 2019:431-432.  
872 173. Prats-Urbe AA, M. S.: Strauss, V. Y.: Prieto-Alhambra, D. The performance of  
873 instrumental variables in medical device epidemiology: A simulation study of non-normally  
874 distributed continuous outcome data based on real world post-operative PROMs.  
875 *Pharmacoepidemiology and Drug Safety*. October  
876 2020;doi:<https://dx.doi.org/10.1002/pds.5114>  
877 174. Puig IS, M.: Nyssen, O. P.: Fiorini, G.: Vaira, D.: Saracino, I.: Perez-Aisa, A.: Fernandez-  
878 Moreno, N.: Santaella, I.: Castro-Fernandez, M.: Bujanda, L.: Lucendo, A.: Areia, M.: Gasbarrini,  
879 A.: Romano, M.: Gravina, A.: Marcos-Pinto, R.: Megraud, F.: O'Morain, C.: Gisbert, J. P. Real-  
880 world comparative effects of three-in-one single capsule bismuth quadruple therapy vs non-  
881 bismuth quadruple concomitant therapy: Interim analysis of the European Registry on H. pylori  
882 Management (Hp-EuReg). *Helicobacter Conference: 33rd International Workshop on*  
883 *Helicobacter and Microbiota in Inflammation and Cancer Virtual*.  
884 2020;doi:<https://dx.doi.org/10.1111/hel.12745>  
885 175. Reeves BCS, L. J.: Taylor, J.: Hogg, R.: Rogers, C. A.: Wordsworth, S.: Townsend, D.:  
886 Muldrew, A.: Peto, T.: Violato, M.: Dakin, H.: Cappel-Porter, H.: Mills, N.: O'Reilly, D.: Harding, S.  
887 P.: Chakravarthy, U. The Effectiveness, cost-effectiveness and acceptability of Community  
888 versus Hospital Eye Service follow-up for patients with neovascular age-related macular  
889 degeneration with quiescent disease (ECHOES): A virtual randomised balanced incomplete block  
890 trial. *Health Technology Assessment*. November 2016;doi:<http://dx.doi.org/10.3310/hta20800>  
891 176. Rentsch CTB, J. A.: Tomlinson, L.: Gellad, W. F.: Alcorn, C.: Kidwai-Khan, F.: Skanderson,  
892 M.: Brittain, E.: King, J. T.: Ho, Y. L.: Eden, S.: Kundu, S.: Lann, M. F.: Greevy, R. A.: Ho, P. M.:  
893 Heidenreich, P. A.: Jacobson, D. A.: Douglas, I. J.: Tate, J. P.: Evans, S. J. W.: Atkins, D.: Justice, A.

894 C.: Freiberg, M. S. Safety and effectiveness of prophylactic anticoagulation for prevention of  
895 COVID-19 mortality: A nationwide cohort study of hospitalised patients in the US.  
896 *Pharmacoepidemiology and Drug Safety*. August 2021;doi:<http://dx.doi.org/10.1002/pds.5305>  
897 177. Rodriguez CA. Causal Inference for the Treatment of Multidrug-Resistant Tuberculosis.  
898 *Journal*. 2021 2021;  
899 178. Rossides M. Epidemiological Aspects of Sarcoidosis: Risk Factors and Long-Term  
900 Consequences. *Journal*. 2021 2021;  
901 179. Sabathe CC, R.: Vukusic, S.: Leray, E.: Mathey, G.: De Seze, J.: Ciron, J.: Wiertlewski, S.:  
902 Ruet, A.: Pelletier, J.: Zephir, H.: Michel, L.: Lebrun-Frenay, C.: Moisset, X.: Thouvenot, E.:  
903 Camdessanche, J. P.: Bakchine, S.: Stankoff, B.: Al Khedr, A.: Cabre, P.: Maillart, E.: Berger, E.:  
904 Heinzlef, O.: Hankiewicz, K.: Moreau, T.: Gout, O.: Bourre, B.: Wahab, A.: Labauge, P.:  
905 Montcuquet, A.: Defer, G.: Maurousset, A.: Maubeuge, N.: Boulos Dalia, D.: Ben Nasr, H.: Nifle,  
906 C.: Casez, O.: Laplaud, D. A.: Foucher, Y. Improving the decision to switch from first to second-  
907 line therapy in MS: A dynamic scoring system. *Multiple Sclerosis Journal*. October  
908 2021;doi:<http://dx.doi.org/10.1177/13524585211044647>  
909 180. Sanchez AR, V. H.: Navarro, M.: Pineda, M. P.: Caballol Oliva, B.: Moreno, L.: Carballal, S.:  
910 Rodriguez-Alonso, L.: Teresa, R. Y. C.: Llorca, G.: Romero, C.: Pinol, V.: Lopez, A.: Salces, I.: Pico  
911 Sala, M. D.: Rivas, L.: Bujanda Fernandez de Pierola, L.: Garzon, M.: Pizarro Moreno, E.:  
912 Martinez De Castro, E.: Lopez-Arias, M. J.: Poves, C.: Garau Colom, C.: Rodriguez-Alcalde, D.:  
913 Herraiz, M.: Alvarez Urturi, C.: Bessa, X.: Dacal Rivas, A.: Carrillo-Palau, M.: Cid-Gomez, L.:  
914 Ponce, M.: Suarez Gonzalez, A.: Saperas Franch, E.: Aguirre, E.: Morales-Romero, B.: Ocana, T.:  
915 Rivero Sanchez, L.: Jung, G.: Cubiella, J.: Jover, R.: Rodriguez-Moranta, F.: Balmana, J.: Castells,  
916 A.: Capella, G.: Serra-Burriel, M.: Moreira Ruiz, L.: Pellise Urquiza, M.: Balaguer, F. Association  
917 between colonoscopy quality indicators, diagnostic yield, and post colonoscopy colorectal  
918 cancer incidence in lynch syndrome. *United European Gastroenterology Journal*. October  
919 2020;doi:<https://dx.doi.org/10.1177/2050640620927344>  
920 181. Sankaran SKP, Sonis S. Relationships and Impact of Ulcerative Mucositis on Patients  
921 Hospitalized for Cancer Therapy: Real-World Evidence Grounded on Big Data. Conference  
922 Abstract. *Supportive Care in Cancer*. June 2022;30(Supplement 1):S65.  
923 doi:<https://dx.doi.org/10.1007/s00520-022-07099-y>  
924 182. Schaufler C, Kaul S, Fleishman A, et al. Immediate Radiotherapy Versus Observation in  
925 Patients with Node-Positive Prostate Cancer after Radical Prostatectomy. Conference Abstract.  
926 *Journal of Urology*. May 2022;207(SUPPL 5):e403-e404.  
927 doi:<https://dx.doi.org/10.1097/JU.0000000000002564.04>  
928 183. Schmidt MS, H. T.: Pedersen, L. Cardiovascular risks associated with diclofenac initiation:  
929 A nationwide emulated randomized trial. *European Heart Journal*. August  
930 2017;doi:<http://dx.doi.org/10.1093/eurheartj/ehx502.1015>  
931 184. Sharma AO, Gina: Holodniy, Mark. Effectiveness of a third dose of BNT162b2 or mRNA-  
932 1273 vaccine for preventing post-vaccination COVID-19 infection: an observational study. *NA*.  
933 2021;doi:10.1101/2021.11.29.21266777  
934 185. Siebert UK, F.: Arvandi, M.: Hess, L. M.: Faries, D. E.: Beyrer, J.: Matteucci Gothe, R.:  
935 Gothe, H.: Stojkov, I.: Rochau, U.: Oberaigner, W.: Zeimet, A. G.: Marth, C. Comparative  
936 effectiveness analysis using real world evidence (RWE) and applying a causal marginal structural

937 model: The case of second-line treatment in patients with ovarian cancer. *Value in Health*. May  
938 2018;

939 186. Smith LH. *Bias bounds and target trials for causal inference in observational*  
940 *epidemiology*. Harvard University; 2021.

941 187. Soto-Becerra PC, Carlos: Hurtado-Roca, Yamilee: Araujo-Castillo, Roger V. Real-World  
942 Effectiveness of hydroxychloroquine, azithromycin, and ivermectin among hospitalized COVID-  
943 19 patients: Results of a target trial emulation using observational data from a nationwide  
944 Healthcare System in Peru. *SSRN Electronic Journal*. 2020;doi:10.2139/ssrn.3710623

945 188. Steen J, Vansteelandt S, Decruyenaere J, Van Biesen W. Target Trial Emulation on Timing  
946 of Start of Renal Replacement Therapy in Acute Kidney Injury: Lessons Learned. Conference  
947 Abstract. *Nephrology Dialysis Transplantation*. May 2022;37(SUPPL 3):i266-i268.  
948 doi:<https://dx.doi.org/10.1093/ndt/gfac135.018>

949 189. Subramaniam H. The Effect of Antiretroviral Therapy on Preterm Birth in a U.S  
950 Population of Women Living with HIV: A Reexamination of Analysis Methods. *Journal*. 2020  
951 2020;

952 190. Sun JY, J.: Sarvet, A.: Lin, P. I. D.: Toh, S.: Block, J. Risk of type 2 diabetes among children  
953 initiating anticonvulsant mood stabilizers: Application of a target trial approach.  
954 *Pharmacoepidemiology and Drug Safety*. August 2021;doi:<http://dx.doi.org/10.1002/pds.5305>

955 191. Thomas DSL, Aaron Y.: Müller, Philipp L.: Schwartz, Roy: Olvera-Barrios, Abraham:  
956 Warwick, Alasdair: Patel, Praveen J.: Heeren, Tjebo F. C.: Egan, Catherine A.: Taylor, Paul: Tufail,  
957 Adnan. Contextualising Single-Arm Ophthalmology Trials With Real-World Data: An Emulated  
958 Target Trial Comparing The Efficacy of Interventions For Neovascular Age-Related Macular  
959 Degeneration. *NA*. 2020;doi:10.1101/2020.08.10.20171538

960 192. Tran V-TM, Matthieu: Sadr, Firouze Bani: Robineau, Olivier: Perpoint, Thomas:  
961 Perrodeau, Elodie: Gallay, Laure: Ravaud, Philippe: Goehringer, François: Lescure, Xavier:  
962 Cocorico, N. A. Association between corticosteroids and intubation or death among patients  
963 with COVID-19 pneumonia in non-ICU settings: an observational study using of real-world data  
964 from 51 hospitals in France and Luxembourg. *NA*. 2020;doi:10.1101/2020.09.16.20195750

965 193. Trevisan M. *Drug Safety and Effectiveness in Relation to Kidney Function: A*  
966 *Pharmacoepidemiological Approach*. Karolinska Institutet (Sweden); 2021.

967 194. Ughetto AE, J.: David, H.: Nagot, N.: Bazalgette, F.: Marin, G.: Mourad, M.: Kollen, S.:  
968 Gaudard, P.: Colson, P. Impact of Temporary Mechanical Circulatory Support on mortality in  
969 Cardiogenic Shock: An emulated target trial with a prospective, multicenter, French cohort  
970 study. *Intensive Care Medicine Experimental Conference: European Society of Intensive Care*  
971 *Medicine Annual Congress, ESICM*. 2021;doi:<http://dx.doi.org/10.1186/s40635-021-00413-8>

972 195. Urner MB, A. G.: Li Bassi, G.: Brodie, D.: Dalton, H. J.: Ferguson, N. D.: Heinsar, S.:  
973 Hodgson, C.: Peek, G.: Shekar, K.: Suen, J. Y.: Fraser, J.: Fan, E. Venovenous Extracorporeal  
974 Membrane Oxygenation in Patients with Acute Respiratory Failure from COVID-19. *Intensive*  
975 *Care Medicine Experimental Conference: European Society of Intensive Care Medicine Annual*  
976 *Congress, ESICM*. 2021;doi:<http://dx.doi.org/10.1186/s40635-021-00413-8>

977 196. Van Santen DKB, A.: Master, A.: Lodi, S.: Prins, M. Harm reduction revisited: The causal  
978 effect of the Dutch approach towards people who inject drugs on HIV, hepatitis B and C  
979 infection risk. *Journal of the International AIDS Society Conference: 23rd International AIDS*  
980 *Conference Virtual*. 2020;doi:<https://dx.doi.org/10.1002/jia2.25547>

- 981 197. Wallisch C, Strohmaier S, Kammer M, et al. Survival Benefit of Kidney Transplantation  
982 Compared to Long-Term Dialysis Across Ages: A Retrospective Cohort Study Using Target Trial  
983 Emulation. *Available at SSRN 3991625*. 2021;
- 984 198. Watson K. Epidemiologic Approaches to Investigating the Relationship between Insulin  
985 Resistance and Major Depressive Disorder. *Journal*. 2020 2020;
- 986 199. Webb BJB, Whitney R.: Vento, Todd J.: Butler, Allison M.: Grisel, Nancy: Brown, Samuel  
987 M.: Peltan, Ithan D.: Spivak, Emily S.: Shah, Mark B.: Sakata, Theadora: Wallin, Anthony:  
988 Stenehjem, Eddie: Poulsen, Greg: Bledsoe, Joseph. Real-World Effectiveness and Tolerability of  
989 Monoclonal Antibodies for Ambulatory Patients with Early COVID-19. *NA*.  
990 2021;doi:10.1101/2021.03.15.21253646
- 991 200. Wintzell V. Pharmacoepidemiologic Studies of Drug Safety in Pediatric Chronic  
992 Inflammatory Disease. *Journal*. 2021 2021;
- 993 201. Zang CZ, Hao: Xu, Jie: Zhang, Hansi: Fouladvand, Sajjad: Havaladar, Shreyas: Cheng,  
994 Feixiong: Chen, Kun: Chen, Yong: Glicksberg, Benjamin S.: Chen, Jin: Bian, Jiang: Wang, Fei.  
995 High-Throughput Clinical Trial Emulation with Real World Data and Machine Learning: A Case  
996 Study of Drug Repurposing for Alzheimer's Disease. *NA*.  
997 2022;doi:10.1101/2022.01.31.22270132
- 998 202. Zhao J, Sjolander A, Edgren G. Effect of blood donor sex and parity on mortality among  
999 adult patients transfused with red-cells: A nationwide natural experiment. Conference Abstract.  
1000 *Vox Sanguinis*. 2022;117(SUPPL 1):50. doi:<https://dx.doi.org/10.1111/vox.13285>

1001

## 1002 **Other (40)**

1003

- 1004 203. Abstracts from the 2020 Annual Meeting of the Society of General Internal Medicine.  
1005 *Journal of General Internal Medicine*. 2020/07/01 2020;35(1):1-779. doi:10.1007/s11606-020-  
1006 05890-3

- 1007 204. Angriman F, Rosella LC, Lawler PR, et al. Renin-Angiotensin System Inhibitors and Major  
1008 Cardiovascular Events after Sepsis. *Ann Am Thorac Soc*. Oct 17  
1009 2022;doi:10.1513/AnnalsATS.202207-615OC

- 1010 205. Ben-Michael E, Feller A, Stuart EA. A Trial Emulation Approach for Policy Evaluations  
1011 with Group-level Longitudinal Data. *Epidemiology*. 2021;32(4):533-540.  
1012 doi:10.1097/ede.0000000000001369

- 1013 206. Buchanan ALB, S.: Goedel, William C.: King, Maximilian: Murray, Eleanor J.: Friedman,  
1014 Samuel R.: Halloran, M. Elizabeth: Marshall, Brandon D. L. Disseminated Effects in Agent-Based  
1015 Models: A Potential Outcomes Framework and Application to Inform Preexposure Prophylaxis  
1016 Coverage Levels for HIV Prevention. *American journal of epidemiology*.  
1017 2020;doi:10.1093/aje/kwaa239

- 1018 207. Buranupakor TPT, Jayanton Patumanond, Phichayut Phinyo. Emulation of a Target Trial  
1019 to Evaluate the Causal Effect of Palliative Care Consultation on the Survival Time of Patients  
1020 with Hepatocellular Carcinoma. *Cancers*. 2021: 2021-03-05  
1021 2021;doi:<http://dx.doi.org/10.3390/cancers13050992>

- 1022 208. Chemaitelly H, AlMukdad S, Ayoub HH, et al. Effectiveness of the BNT162b2 vaccine  
1023 against SARS-CoV-2 infection among children and adolescents in Qatar. *NA*. 2022;NA(NA):NA-  
1024 NA. doi:10.1101/2022.07.26.22278045

1025 209. Chemaitelly H, Ayoub HH, AlMukdad S, et al. Protection of prior natural infection  
1026 compared to mRNA vaccination against SARS-CoV-2 infection and severe COVID-19 in Qatar.  
1027 NA. 2022;NA(NA):NA-NA. doi:10.1101/2022.03.17.22272529

1028 210. Chemaitelly H, Ayoub HH, Tang P, et al. Immune protection against SARS-CoV-2 re-  
1029 reinfection and immune imprinting. Preprint. *medRxiv*.  
1030 2022;24doi:<https://dx.doi.org/10.1101/2022.08.23.22279026>

1031 211. Chemaitelly H, Nagelkerke N, Ayoub HH, et al. Duration of immune protection of SARS-  
1032 CoV-2 natural infection against reinfection in Qatar. NA. 2022;NA(NA):NA-NA.  
1033 doi:10.1101/2022.07.06.22277306

1034 212. Chen X. Causal Inference and Prediction on Observational Data with Survival Outcomes.  
1035 2020;

1036 213. Chen Z, Zhang H, George TJ, et al. Simulating Colorectal Cancer Trials Using Real-World  
1037 Data. *JCO clinical cancer informatics*. 2022;6(6):e2100195-NA. doi:10.1200/cci.21.00195

1038 214. Dryden-Peterson S, Kim A, Kim AY, et al. Nirmatrelvir plus ritonavir for early COVID-19  
1039 and hospitalization in a large US health system. Preprint. *medRxiv*.  
1040 2022;16doi:<https://dx.doi.org/10.1101/2022.06.14.22276393>

1041 215. Heil TC, Verdaasdonk EGG, Maas HAAM, et al. Improved Postoperative Outcomes after  
1042 Prehabilitation for Colorectal Cancer Surgery in Older Patients: An Emulated Target Trial. *Annals*  
1043 *of surgical oncology*. 2022;05doi:<https://dx.doi.org/10.1245/s10434-022-12623-9>

1044 216. Hoffman KL, Schenck EJ, Satlin MJ, et al. Comparison of a Target Trial Emulation  
1045 Framework vs Cox Regression to Estimate the Association of Corticosteroids With COVID-19  
1046 Mortality. *JAMA Netw Open*. Oct 3 2022;5(10):e2234425.  
1047 doi:10.1001/jamanetworkopen.2022.34425

1048 217. Hoffman KL, Schenck EJ, Satlin MJ, et al. Corticosteroids in COVID-19: Optimizing  
1049 Observational Research through Target Trial Emulations. *medRxiv*. Jun 7  
1050 2022;doi:10.1101/2022.05.27.22275037

1051 218. Hoffman KL, Schenck EJ, Satlin MJ, et al. Comparison of a Target Trial Emulation  
1052 Framework vs Cox Regression to Estimate the Association of Corticosteroids With COVID-19  
1053 Mortality. *JAMA network open*. 03 Oct 2022;5(10):e2234425.  
1054 doi:<https://dx.doi.org/10.1001/jamanetworkopen.2022.34425>

1055 219. Hoffman KL, Schenck EJ, Satlin MJ, et al. Corticosteroids in COVID-19: Optimizing  
1056 Observational Research through Target Trial Emulations. *medRxiv : the preprint server for*  
1057 *health sciences*. 2022;NA(NA):NA-NA. doi:10.1101/2022.05.27.22275037

1058 220. Huitfeldt A, Kalager M, Robins JM, Hoff G, Hernán MA. Methods to estimate the  
1059 comparative effectiveness of clinical strategies that administer the same intervention at  
1060 different times. *Current epidemiology reports*. 2015;2(3):149-161.

1061 221. Ioannou GN, Bohnert ASB, O'Hare AM, et al. Effectiveness of mRNA COVID-19 vaccine  
1062 boosters against infection, hospitalization and death: A target trial emulation in the omicron  
1063 (B.1.1.529) variant era. Preprint. *medRxiv*.  
1064 2022;16doi:<https://dx.doi.org/10.1101/2022.06.15.22276466>

1065 222. Jiao T, Fillion KB, Douros A, Platt RW. Antihypertensive treatment patterns in the United  
1066 Kingdom. WILEY 111 RIVER ST, HOBOKEN 07030-5774, NJ USA; 2020:148-148.

- 1067 223. Jiao T, Platt RW, Douros A, Filion KB. Target blood pressure levels and the risk of major  
1068 adverse cardiovascular events among patients with hypertension at low cardiovascular disease  
1069 risk. *WILEY* 111 RIVER ST, HOBOKEN 07030-5774, NJ USA; 2021:350-350.
- 1070 224. Kainz A, Kammer M, Reindl-Schwaighofer R, et al. EFFECT OF WAITING TIME ON  
1071 MORTALITY AFTER SECOND KIDNEY TRANSPLANTATION. *WILEY* 111 RIVER ST, HOBOKEN 07030-  
1072 5774, NJ USA; 2021:32-32.
- 1073 225. Kainz A, Kammer M, Reindl-Schwaighofer R, et al. Waiting Time for Second Kidney  
1074 Transplantation and Mortality. *Clin J Am Soc Nephrol*. Jan 2022;17(1):90-97.  
1075 doi:10.2215/cjn.07620621
- 1076 226. Kennedy J, Parker M, Seaborne M, et al. Health care use attributable to COVID-19: A  
1077 propensity matched national electronic health records cohort study of 249,390 people in  
1078 Wales, UK. *NA*. 2022;NA(NA):NA-NA. doi:10.1101/2022.04.21.22274152
- 1079 227. Koretz RL. In US veterans, PPIs were linked to increased all-cause and some cause-  
1080 specific mortality compared with H2-blockers. *Annals of internal medicine*. 2019;171(6):JC35.
- 1081 228. Martire LR. Sickness absence among patients with chronic pain in Swedish specialist  
1082 healthcare. 2021;
- 1083 229. Nguyen VG, Yavlinsky A, Beale S, et al. Comparative effectiveness of different primary  
1084 vaccination courses on mRNA based booster vaccines against SARs-COV-2 infections: A time-  
1085 varying cohort analysis using trial emulation in the Virus Watch community cohort. Preprint.  
1086 *medRxiv*. 2022;06doi:<https://dx.doi.org/10.1101/2022.02.04.22270479>
- 1087 230. Nguyen VG, Zylbergsztejn A, Harron K, et al. SEN support from the start of school and its  
1088 impact on unplanned hospital utilisation in children with cleft lip and palate: a demonstration  
1089 target trial emulation protocol using ECHILD. Preprint. *medRxiv*.  
1090 2022;05doi:<https://dx.doi.org/10.1101/2022.04.01.22273280>
- 1091 231. Rauh-Hain JA, Zubizarreta J, Nitecki R, et al. Survival outcomes following pregnancy or  
1092 assisted reproductive technologies after breast cancer: A population-based study. *Cancer*.  
1093 2022;128(17):3243-3253. doi:10.1002/cncr.34371
- 1094 232. Schnitzer ME, Guerra SF, Longo C, Blais L, Platt RW. A potential outcomes approach to  
1095 defining and estimating gestational age-specific exposure effects during pregnancy. *Statistical*  
1096 *methods in medical research*. 2022;31(2):300-314. doi:10.1177/09622802211065158
- 1097 233. Simmonds KP, Burke J, Kozlowski AJ, Andary M, Luo Z, Reeves MJ. Emulating 3 Clinical  
1098 Trials That Compare Stroke Rehabilitation at Inpatient Rehabilitation Facilities With Skilled  
1099 Nursing Facilities. *Archives of physical medicine and rehabilitation*. 2022;103(7):1311-1319.  
1100 doi:10.1016/j.apmr.2021.12.029
- 1101 234. Simmonds KP, Burke J, Kozlowski AJ, Andary M, Luo ZH, Reeves MJ. Emulating 3 Clinical  
1102 Trials That Compare Stroke Rehabilitation at Inpatient Rehabilitation Facilities With Skilled  
1103 Nursing Facilities. Article. *Archives of Physical Medicine and Rehabilitation*. Jul  
1104 2022;103(7):1311-1319. doi:10.1016/j.apmr.2021.12.029
- 1105 235. Sun JW, Young JG, Sarvet AL, et al. Comparison of Rates of Type 2 Diabetes in Adults and  
1106 Children Treated With Anticonvulsant Mood Stabilizers. *JAMA network open*.  
1107 2022;5(4):e226484-e226484. doi:10.1001/jamanetworkopen.2022.6484
- 1108 236. Thomas J, Manser D, Thomas P, et al. Stroke Society of Australasia Annual Scientific  
1109 Meeting 13-15 October 2021, Perth Australia. *Int J Stroke*. 2021:3-34.

1110 237. Toh S, Manson JE. An analytic framework for aligning observational and randomized trial  
1111 data: application to postmenopausal hormone therapy and coronary heart disease. *Statistics in*  
1112 *biosciences*. 2013;5(2):344-360.

1113 238. Tsuzuki S, Hayakawa K, Uemura Y, et al. Effectiveness of remdesivir in hospitalized  
1114 nonsevere patients with COVID-19 in Japan: A large observational study using the COVID-19  
1115 Registry Japan. *International journal of infectious diseases : IJID : official publication of the*  
1116 *International Society for Infectious Diseases*. 2022;118(NA):119-125.  
1117 doi:10.1016/j.ijid.2022.02.039

1118 239. Weinstein SMC, Laura C.: Helliwell, Philip S.: Ogdie, Alexis: Stephens-Shields, Alisa J.  
1119 Simulation-based design of pragmatic trials in psoriatic arthritis using propensity scores. *Clinical*  
1120 *trials (London, England)*. 2021;doi:10.1177/17407745211023840

1121 240. Westerberg ML, R.: Holmberg, L.: Stattin, P.: Garmo, H. Simulation model of disease  
1122 incidence driven by diagnostic activity. *Statistics in Medicine*. 28-Feb  
1123 2021;doi:<http://dx.doi.org/10.1002/sim.8833>

1124 241. Yland JJ, Chiu YH, Rinaudo P, Hsu J, Hernan MA, Hernandez-Diaz S. Emulating a target  
1125 trial of the comparative effectiveness of clomiphene citrate and letrozole for ovulation  
1126 induction. *Human Reproduction*. 01 Apr 2022;37(4):793-805.  
1127 doi:<https://dx.doi.org/10.1093/humrep/deac005>

1128 242. Zhu J, Zhang H, Brazier E, et al. The impact of WHO's Treat All guideline on disease  
1129 progression among people enrolled in HIV care in Central Africa: an observational cohort data  
1130 by target trial design with multistate modeling. Preprint. *medRxiv*.  
1131 2022;30doi:<https://dx.doi.org/10.1101/2022.08.27.22279144>  
1132  
1133

1134 **Appendix 7.** Subgroup Analysis of Reporting of Target Trial Protocol and How It Was Emulated,  
 1135 by Reporting Guideline Use

|                                                                                   | Value                     | Count (N (%)) |            |
|-----------------------------------------------------------------------------------|---------------------------|---------------|------------|
|                                                                                   | Used reporting guideline? | No (n=157)    | Yes (n=43) |
| <i>How the protocol of the emulated target trial was reported</i>                 | Not fully described       | 54 (34)       | 15 (35)    |
|                                                                                   | Only in text              | 50 (32)       | 19 (44)    |
|                                                                                   | Table                     | 54 (34)       | 9 (21)     |
| <i>Both target trial protocol and its emulation described explicitly as such?</i> | Yes                       | 73 (46)       | 13 (30)    |
| Description of how the target trial was emulated <sup>a</sup>                     |                           |               |            |
| <i>Eligibility criteria</i>                                                       | Yes                       | 151 (96)      | 42 (98)    |
| <i>Treatment strategies</i>                                                       | Yes                       | 149 (96)      | 42 (98)    |
| <i>Assignment procedures</i>                                                      | Yes                       | 142 (90)      | 31 (72)    |
| <i>Outcome(s)</i>                                                                 | Yes                       | 152 (97)      | 42 (98)    |
| <i>Follow-up</i>                                                                  | Yes                       | 146 (93)      | 40 (93)    |
| <i>Causal contrast(s)</i>                                                         | Yes                       | 112 (71)      | 34 (79)    |
| <i>Analysis plan</i>                                                              | Yes                       | 153 (97)      | 41 (95)    |
| <i>Specification of time zero (i.e., baseline)</i>                                | Yes                       | 128 (82)      | 37 (86)    |

1136 <sup>a</sup>. Operational definitions of target trial protocol items are described in Appendix 5.  
 1137
