# Supplementary material for: Reporting of Observational Studies Explicitly Aiming to Emulate Randomized Trials: A Systematic Review
Source: PubMed Central journal article supplement (PMC10534275; doi:10.1001/jamanetworkopen.2023.36023), 2023-09-27
Supplement: jamanetwopen-e2336023-s002.pdf [file jamanetwopen-e2336023-s002.pdf]

## Data Sharing Statement

Hansford. Reporting of Observational Studies Explicitly Emulating Randomized Trials. *JAMA Netw Open*. Published September 27, 2023. doi:10.1001/jamanetworkopen.2023.36023

### Data

**Data available:** Yes

**Data types:** Data (not involving human participants)

**How to access data:** [osf.io/uj56m/](https://osf.io/uj56m/)

**When available:** With publication

### Supporting Documents

**Document types:** Statistical/analytic code

**How to access documents:** [osf.io/uj56m/](https://osf.io/uj56m/)

**When available:** With publication

### Additional Information

**Who can access the data:** Public

**Types of analyses:** All analyses

**Mechanisms of data availability:** Public
